# Supplementary material
Source: publisher figshare collection journal article supplement (https://acs.figshare.com/ndownloader/files/5337289)
Supplement: Supplementary file 1 [file 5337289]

  
data_Compound_13
  
_audit_creation_method            SHELXL-97 
_chemical_name_systematic 
; 
 ? 
; 
_chemical_name_common             ? 
_chemical_melting_point           ? 
_chemical_formula_moiety
 'C44 H92 N6 O4 P4 Si4 Y2, 0.5(C7 H8)'
_chemical_formula_sum 
 'C47.50 H96 N6 O4 P4 Si4 Y2' 
_chemical_formula_weight          1229.36 
  
loop_ 
 _atom_type_symbol 
 _atom_type_description 
 _atom_type_scat_dispersion_real 
 _atom_type_scat_dispersion_imag 
 _atom_type_scat_source 
 'C'  'C'   0.0033   0.0016 
 'International Tables Vol C Tables 4.2.6.8 and 6.1.1.4' 
 'H'  'H'   0.0000   0.0000 
 'International Tables Vol C Tables 4.2.6.8 and 6.1.1.4' 
 'N'  'N'   0.0061   0.0033 
 'International Tables Vol C Tables 4.2.6.8 and 6.1.1.4' 
 'O'  'O'   0.0106   0.0060 
 'International Tables Vol C Tables 4.2.6.8 and 6.1.1.4' 
 'Si'  'Si'   0.0817   0.0704 
 'International Tables Vol C Tables 4.2.6.8 and 6.1.1.4' 
 'P'  'P'   0.1023   0.0942 
 'International Tables Vol C Tables 4.2.6.8 and 6.1.1.4' 
 'Y'  'Y'  -2.7962   3.5667 
 'International Tables Vol C Tables 4.2.6.8 and 6.1.1.4' 
  
_symmetry_cell_setting            Tetragonal 
_symmetry_space_group_name_H-M    I4(1)/a 
  
loop_ 
 _symmetry_equiv_pos_as_xyz 
 'x, y, z' 
 '-x+1/2, -y, z+1/2' 
 '-y+3/4, x+1/4, z+1/4' 
 'y+3/4, -x+3/4, z+3/4' 
 'x+1/2, y+1/2, z+1/2' 
 '-x+1, -y+1/2, z+1' 
 '-y+5/4, x+3/4, z+3/4' 
 'y+5/4, -x+5/4, z+5/4' 
 '-x, -y, -z' 
 'x-1/2, y, -z-1/2' 
 'y-3/4, -x-1/4, -z-1/4' 
 '-y-3/4, x-3/4, -z-3/4' 
 '-x+1/2, -y+1/2, -z+1/2' 
 'x, y+1/2, -z' 
 'y-1/4, -x+1/4, -z+1/4' 
 '-y-1/4, x-1/4, -z-1/4' 
  
_cell_length_a                  17.77032(11) 
_cell_length_b                  17.77032(11) 
_cell_length_c                  40.3177(4) 
_cell_angle_alpha               90
_cell_angle_beta                90
_cell_angle_gamma               90
_cell_volume                      12731.67(16) 
_cell_formula_units_Z             8 
_cell_measurement_temperature     173(2) 
_cell_measurement_reflns_used     34297 
_cell_measurement_theta_min       3.7509 
_cell_measurement_theta_max       32.0545 
  
_exptl_crystal_description        prisms 
_exptl_crystal_colour             Colourless 
_exptl_crystal_size_max           0.34 
_exptl_crystal_size_mid           0.31 
_exptl_crystal_size_min           0.24 
_exptl_crystal_density_meas       ? 
_exptl_crystal_density_diffrn     1.283 
_exptl_crystal_density_method     'not measured' 
_exptl_crystal_F_000              5192 
_exptl_absorpt_coefficient_mu     2.032 
_exptl_absorpt_correction_type    multi-scan 
_exptl_absorpt_correction_T_min   0.78921 
_exptl_absorpt_correction_T_max   1.00000 
_exptl_absorpt_process_details     
; 
CrysAlis RED, Oxford Diffraction Ltd., 
Version 1.171.32.5 (release 08-05-2007 CrysAlis171 .NET) 
(compiled May  8 2007,13:10:02) 
Empirical absorption correction using spherical harmonics, 
implemented in SCALE3 ABSPACK scaling algorithm. 
; 
  
_exptl_special_details 
; 
 ? 
; 
  
_diffrn_ambient_temperature       173(2) 
_diffrn_radiation_wavelength      0.71073 
_diffrn_radiation_type            MoK\a 
_diffrn_radiation_source         'Enhance (Mo) X-ray Source'
_diffrn_radiation_monochromator   graphite 
_diffrn_measurement_device_type   'OD Xcalibur 3' 
_diffrn_measurement_method        'omega scans' 
_diffrn_detector_area_resol_mean  15.9863 
_diffrn_standards_number          0 
_diffrn_standards_interval_count  ? 
_diffrn_standards_interval_time   ? 
_diffrn_standards_decay_%         ? 
_diffrn_reflns_number             91060 
_diffrn_reflns_av_R_equivalents   0.0436 
_diffrn_reflns_av_sigmaI/netI     0.0510 
_diffrn_reflns_limit_h_min        -26 
_diffrn_reflns_limit_h_max        26 
_diffrn_reflns_limit_k_min        -26 
_diffrn_reflns_limit_k_max        24 
_diffrn_reflns_limit_l_min        -59 
_diffrn_reflns_limit_l_max        60 
_diffrn_reflns_theta_min          3.76 
_diffrn_reflns_theta_max          32.14 
_reflns_number_total              10735 
_reflns_number_gt                 7265 
_reflns_threshold_expression      >2sigma(I) 
  
_computing_data_collection        'CrysAlis CCD, Oxford Diffraction Ltd' 
_computing_cell_refinement        'CrysAlis RED, Oxford Diffraction Ltd' 
_computing_data_reduction         'CrysAlis RED, Oxford Diffraction Ltd' 
_computing_structure_solution     'SHELXS-97 (Sheldrick, 1990)' 
_computing_structure_refinement   'SHELXL-97 (Sheldrick, 1997)' 
_computing_molecular_graphics     'Bruker SHELXTL' 
_computing_publication_material   'Bruker SHELXTL' 
  
_refine_special_details 
; 
 Refinement of F^2^ against ALL reflections.  The weighted R-factor wR and 
 goodness of fit S are based on F^2^, conventional R-factors R are based 
 on F, with F set to zero for negative F^2^. The threshold expression of 
 F^2^ > 2sigma(F^2^) is used only for calculating R-factors(gt) etc. and is 
 not relevant to the choice of reflections for refinement.  R-factors based 
 on F^2^ are statistically about twice as large as those based on F, and R- 
 factors based on ALL data will be even larger. 
; 
  
_refine_ls_structure_factor_coef  Fsqd 
_refine_ls_matrix_type            full 
_refine_ls_weighting_scheme       calc 
_refine_ls_weighting_details 
 'calc w=1/[\s^2^(Fo^2^)+(0.0397P)^2^+9.4160P] where P=(Fo^2^+2Fc^2^)/3' 
_atom_sites_solution_primary      direct 
_atom_sites_solution_secondary    difmap 
_atom_sites_solution_hydrogens    geom 
_refine_ls_hydrogen_treatment     mixed 
_refine_ls_extinction_method      none 
_refine_ls_extinction_coef        ? 
_refine_ls_number_reflns          10735 
_refine_ls_number_parameters      350 
_refine_ls_number_restraints      155 
_refine_ls_R_factor_all           0.0743 
_refine_ls_R_factor_gt            0.0354 
_refine_ls_wR_factor_ref          0.0940 
_refine_ls_wR_factor_gt           0.0764 
_refine_ls_goodness_of_fit_ref    1.086 
_refine_ls_restrained_S_all       1.109 
_refine_ls_shift/su_max           0.001 
_refine_ls_shift/su_mean          0.000 
  
loop_ 
 _atom_site_label 
 _atom_site_type_symbol 
 _atom_site_fract_x 
 _atom_site_fract_y 
 _atom_site_fract_z 
 _atom_site_U_iso_or_equiv 
 _atom_site_adp_type 
 _atom_site_occupancy 
 _atom_site_symmetry_multiplicity 
 _atom_site_calc_flag 
 _atom_site_refinement_flags 
 _atom_site_disorder_assembly 
 _atom_site_disorder_group 
Y Y 0.602970(10) 0.289796(10) 0.108281(4) 0.02104(5) Uani 1 1 d D . . 
O1 O 0.46735(7) 0.31927(8) 0.10410(3) 0.0253(3) Uani 1 1 d . . . 
P2 P 0.47555(3) 0.40216(3) 0.092202(13) 0.02414(11) Uani 1 1 d D A . 
N3 N 0.56503(10) 0.41151(9) 0.09225(4) 0.0279(4) Uani 1 1 d . . . 
C4 C 0.61479(12) 0.45945(11) 0.07529(5) 0.0277(4) Uani 1 1 d . . . 
C5 C 0.68444(12) 0.42647(11) 0.06639(5) 0.0280(4) Uani 1 1 d . . . 
N6 N 0.69380(10) 0.35233(10) 0.07680(4) 0.0302(4) Uani 1 1 d . . . 
P7 P 0.73741(3) 0.27961(3) 0.064152(14) 0.02877(12) Uani 1 1 d D B . 
O8 O 0.68931(9) 0.21642(8) 0.07867(4) 0.0345(3) Uani 1 1 d . . . 
C9 C 0.60135(13) 0.53430(12) 0.06745(6) 0.0349(5) Uani 1 1 d . . . 
H9A H 0.5557 0.5576 0.0742 0.042 Uiso 1 1 calc R . . 
C10 C 0.65469(14) 0.57565(13) 0.04958(6) 0.0408(6) Uani 1 1 d . . . 
H10A H 0.6449 0.6267 0.0440 0.049 Uiso 1 1 calc R . . 
C11 C 0.72100(14) 0.54278(14) 0.04004(6) 0.0419(6) Uani 1 1 d . . . 
H11A H 0.7567 0.5708 0.0276 0.050 Uiso 1 1 calc R . . 
C12 C 0.73614(14) 0.46886(13) 0.04855(6) 0.0372(5) Uani 1 1 d . . . 
H12A H 0.7826 0.4468 0.0421 0.045 Uiso 1 1 calc R . . 
C13 C 0.42650(14) 0.46168(15) 0.12139(7) 0.0445(6) Uani 1 1 d D . . 
H13A H 0.4291 0.5123 0.1106 0.053 Uiso 0.567(6) 1 calc PR A 1 
H13B H 0.4431 0.4386 0.1428 0.053 Uiso 0.433(6) 1 d PR A 2 
C14 C 0.34294(14) 0.44674(16) 0.12294(7) 0.0488(6) Uani 1 1 d D A . 
H14A H 0.3197 0.4809 0.1390 0.073 Uiso 1 1 calc R . . 
H14B H 0.3342 0.3945 0.1298 0.073 Uiso 1 1 calc R . . 
H14C H 0.3207 0.4551 0.1010 0.073 Uiso 1 1 calc R . . 
C15 C 0.4688(3) 0.4729(3) 0.15216(11) 0.0501(14) Uani 0.567(6) 1 d PDU A 1 
H15A H 0.4401 0.5057 0.1671 0.075 Uiso 0.567(6) 1 calc PR A 1 
H15B H 0.5174 0.4964 0.1471 0.075 Uiso 0.567(6) 1 calc PR A 1 
H15C H 0.4773 0.4242 0.1629 0.075 Uiso 0.567(6) 1 calc PR A 1 
C15' C 0.4479(3) 0.5368(3) 0.12653(16) 0.0489(18) Uiso 0.433(6) 1 d PDU A 2 
H15D H 0.4148 0.5597 0.1432 0.073 Uiso 0.433(6) 1 calc PR A 2 
H15E H 0.4437 0.5647 0.1056 0.073 Uiso 0.433(6) 1 calc PR A 2 
H15F H 0.5000 0.5385 0.1344 0.073 Uiso 0.433(6) 1 calc PR A 2 
C16 C 0.43103(12) 0.41079(12) 0.05171(5) 0.0304(4) Uani 1 1 d . . . 
H16A H 0.3817 0.3840 0.0530 0.036 Uiso 1 1 calc R A . 
C17 C 0.41474(16) 0.49101(14) 0.03973(6) 0.0446(6) Uani 1 1 d . A . 
H17A H 0.3907 0.4891 0.0179 0.067 Uiso 1 1 calc R . . 
H17B H 0.4620 0.5192 0.0382 0.067 Uiso 1 1 calc R . . 
H17C H 0.3811 0.5161 0.0555 0.067 Uiso 1 1 calc R . . 
C18 C 0.47915(15) 0.36900(14) 0.02616(6) 0.0411(6) Uani 1 1 d . A . 
H18A H 0.4557 0.3731 0.0042 0.062 Uiso 1 1 calc R . . 
H18B H 0.4830 0.3159 0.0324 0.062 Uiso 1 1 calc R . . 
H18C H 0.5296 0.3913 0.0255 0.062 Uiso 1 1 calc R . . 
C19 C 0.83299(14) 0.26766(17) 0.07988(7) 0.0485(6) Uani 1 1 d D . . 
H19A H 0.8535 0.2186 0.0717 0.058 Uiso 0.77(2) 1 calc PR B 1 
H19B H 0.8498 0.2257 0.0651 0.058 Uiso 0.23(2) 1 d PR B 2 
C20 C 0.8854(4) 0.3316(7) 0.0686(2) 0.067(2) Uani 0.77(2) 1 d PDU B 1 
H20A H 0.9360 0.3231 0.0774 0.101 Uiso 0.77(2) 1 calc PR B 1 
H20B H 0.8661 0.3798 0.0768 0.101 Uiso 0.77(2) 1 calc PR B 1 
H20C H 0.8874 0.3327 0.0443 0.101 Uiso 0.77(2) 1 calc PR B 1 
C21 C 0.8319(3) 0.2667(7) 0.11736(14) 0.082(3) Uani 0.77(2) 1 d PDU B 1 
H21A H 0.8832 0.2600 0.1257 0.123 Uiso 0.77(2) 1 calc PR B 1 
H21B H 0.8002 0.2251 0.1251 0.123 Uiso 0.77(2) 1 calc PR B 1 
H21C H 0.8115 0.3145 0.1256 0.123 Uiso 0.77(2) 1 calc PR B 1 
C20' C 0.8912(9) 0.3142(16) 0.0662(7) 0.055(6) Uiso 0.23(2) 1 d PDU B 2 
H20D H 0.9395 0.3010 0.0764 0.083 Uiso 0.23(2) 1 calc PR B 2 
H20E H 0.8798 0.3672 0.0707 0.083 Uiso 0.23(2) 1 calc PR B 2 
H20F H 0.8941 0.3062 0.0422 0.083 Uiso 0.23(2) 1 calc PR B 2 
C21' C 0.8382(11) 0.2290(15) 0.1106(5) 0.087(6) Uiso 0.23(2) 1 d PDU B 2 
H21D H 0.8912 0.2240 0.1169 0.130 Uiso 0.23(2) 1 calc PR B 2 
H21E H 0.8157 0.1789 0.1084 0.130 Uiso 0.23(2) 1 calc PR B 2 
H21F H 0.8112 0.2574 0.1277 0.130 Uiso 0.23(2) 1 calc PR B 2 
C22 C 0.74409(14) 0.27573(14) 0.01945(6) 0.0385(5) Uani 1 1 d . . . 
H22A H 0.7775 0.3180 0.0123 0.046 Uiso 1 1 calc R B . 
C23 C 0.66743(17) 0.2886(2) 0.00365(7) 0.0673(10) Uani 1 1 d . B . 
H23A H 0.6722 0.2867 -0.0205 0.101 Uiso 1 1 calc R . . 
H23B H 0.6482 0.3381 0.0103 0.101 Uiso 1 1 calc R . . 
H23C H 0.6324 0.2495 0.0111 0.101 Uiso 1 1 calc R . . 
C24 C 0.7802(2) 0.20251(17) 0.00746(8) 0.0735(10) Uani 1 1 d . B . 
H24A H 0.7830 0.2028 -0.0168 0.110 Uiso 1 1 calc R . . 
H24B H 0.7497 0.1597 0.0148 0.110 Uiso 1 1 calc R . . 
H24C H 0.8310 0.1982 0.0167 0.110 Uiso 1 1 calc R . . 
N30 N 0.64675(10) 0.31282(10) 0.15940(4) 0.0294(4) Uani 1 1 d D . . 
Si31 Si 0.6902(3) 0.3966(2) 0.16692(8) 0.0409(10) Uani 0.639(4) 1 d PDU C 1 
H31 H 0.7156 0.4267 0.1354 0.049 Uiso 0.639(4) 1 calc PR C 1 
C32 C 0.6263(5) 0.4686(3) 0.1866(2) 0.095(2) Uani 0.639(4) 1 d PDU C 1 
H32A H 0.5807 0.4742 0.1732 0.142 Uiso 0.639(4) 1 calc PR C 1 
H32B H 0.6524 0.5171 0.1879 0.142 Uiso 0.639(4) 1 calc PR C 1 
H32C H 0.6125 0.4520 0.2090 0.142 Uiso 0.639(4) 1 calc PR C 1 
C33 C 0.7738(4) 0.3891(4) 0.19472(17) 0.0763(18) Uani 0.639(4) 1 d PDU C 1 
H33A H 0.8094 0.3525 0.1855 0.114 Uiso 0.639(4) 1 calc PR C 1 
H33B H 0.7576 0.3725 0.2168 0.114 Uiso 0.639(4) 1 calc PR C 1 
H33C H 0.7983 0.4384 0.1965 0.114 Uiso 0.639(4) 1 calc PR C 1 
Si3' Si 0.7124(4) 0.3835(4) 0.16788(19) 0.0416(19) Uiso 0.172(8) 1 d PDU C 2 
H31' H 0.7425 0.4102 0.1366 0.050 Uiso 0.172(8) 1 calc PR C 2 
C32' C 0.6670(11) 0.4653(8) 0.1897(6) 0.058(5) Uiso 0.172(8) 1 d PDU C 2 
H32D H 0.6230 0.4821 0.1770 0.087 Uiso 0.172(8) 1 calc PR C 2 
H32E H 0.7032 0.5067 0.1915 0.087 Uiso 0.172(8) 1 calc PR C 2 
H32F H 0.6510 0.4497 0.2119 0.087 Uiso 0.172(8) 1 calc PR C 2 
C33' C 0.7923(8) 0.3558(11) 0.1946(5) 0.053(5) Uiso 0.172(8) 1 d PDU C 2 
H33D H 0.8248 0.3205 0.1826 0.079 Uiso 0.172(8) 1 calc PR C 2 
H33E H 0.7732 0.3317 0.2148 0.079 Uiso 0.172(8) 1 calc PR C 2 
H33F H 0.8214 0.4006 0.2007 0.079 Uiso 0.172(8) 1 calc PR C 2 
Si3" Si 0.6884(8) 0.3978(7) 0.1674(3) 0.052(4) Uiso 0.189(8) 1 d PDU C 3 
H31" H 0.6776 0.4439 0.1381 0.062 Uiso 0.189(8) 1 calc PR C 3 
C32" C 0.6517(9) 0.4524(8) 0.2029(4) 0.046(4) Uiso 0.189(8) 1 d PDU C 3 
H32G H 0.5969 0.4568 0.2011 0.070 Uiso 0.189(8) 1 calc PR C 3 
H32H H 0.6742 0.5028 0.2028 0.070 Uiso 0.189(8) 1 calc PR C 3 
H32I H 0.6646 0.4267 0.2237 0.070 Uiso 0.189(8) 1 calc PR C 3 
C33" C 0.7932(7) 0.3916(11) 0.1746(6) 0.078(6) Uiso 0.189(8) 1 d PDU C 3 
H33G H 0.8167 0.3638 0.1563 0.116 Uiso 0.189(8) 1 calc PR C 3 
H33H H 0.8029 0.3654 0.1955 0.116 Uiso 0.189(8) 1 calc PR C 3 
H33I H 0.8145 0.4425 0.1756 0.116 Uiso 0.189(8) 1 calc PR C 3 
Si34 Si 0.62919(4) 0.24866(4) 0.189418(15) 0.03685(15) Uani 1 1 d D C . 
H34 H 0.5719(11) 0.1996(13) 0.1758(7) 0.066(9) Uiso 1 1 d D . . 
C35 C 0.7118(2) 0.18910(19) 0.20041(8) 0.0746(10) Uani 1 1 d . . . 
H35A H 0.7325 0.1664 0.1802 0.112 Uiso 1 1 calc R C . 
H35B H 0.6959 0.1493 0.2157 0.112 Uiso 1 1 calc R . . 
H35C H 0.7503 0.2203 0.2111 0.112 Uiso 1 1 calc R . . 
C36 C 0.59404(18) 0.28905(19) 0.22933(7) 0.0603(8) Uani 1 1 d . . . 
H36A H 0.5503 0.3211 0.2250 0.090 Uiso 1 1 calc R C . 
H36B H 0.6339 0.3191 0.2397 0.090 Uiso 1 1 calc R . . 
H36C H 0.5795 0.2481 0.2443 0.090 Uiso 1 1 calc R . . 
C40 C 0.4847(11) 0.7714(11) 0.1727(5) 0.106(7) Uiso 0.25 1 d PD D -1 
H40A H 0.4460 0.7361 0.1803 0.158 Uiso 0.25 1 calc PR D -1 
H40B H 0.4702 0.8228 0.1788 0.158 Uiso 0.25 1 calc PR D -1 
H40C H 0.5329 0.7588 0.1831 0.158 Uiso 0.25 1 calc PR D -1 
C41 C 0.4926(7) 0.7658(6) 0.13429(17) 0.089(5) Uiso 0.25 1 d PGU D -1 
C42 C 0.4472(8) 0.7177(6) 0.1159(3) 0.111(5) Uiso 0.25 1 d PGDU D -1 
H42A H 0.4104 0.6877 0.1267 0.133 Uiso 0.25 1 calc PR D -1 
C43 C 0.4555(9) 0.7137(9) 0.0817(3) 0.086(5) Uiso 0.25 1 d PGDU D -1 
H43A H 0.4244 0.6808 0.0691 0.104 Uiso 0.25 1 calc PR D -1 
C44 C 0.5093(9) 0.7576(10) 0.06582(18) 0.078(4) Uiso 0.25 1 d PGDU D -1 
H44A H 0.5150 0.7548 0.0424 0.094 Uiso 0.25 1 calc PR D -1 
C45 C 0.5548(7) 0.8057(8) 0.0842(2) 0.076(4) Uiso 0.25 1 d PGDU D -1 
H45A H 0.5916 0.8357 0.0734 0.091 Uiso 0.25 1 calc PR D -1 
C46 C 0.5465(6) 0.8097(6) 0.1185(2) 0.072(4) Uiso 0.25 1 d PGDU D -1 
H46A H 0.5775 0.8426 0.1310 0.087 Uiso 0.25 1 calc PR D -1 
  
loop_ 
 _atom_site_aniso_label 
 _atom_site_aniso_U_11 
 _atom_site_aniso_U_22 
 _atom_site_aniso_U_33 
 _atom_site_aniso_U_23 
 _atom_site_aniso_U_13 
 _atom_site_aniso_U_12 
Y 0.02375(10) 0.02072(9) 0.01865(8) 0.00002(7) -0.00055(7) -0.00324(7) 
O1 0.0256(7) 0.0241(7) 0.0263(7) 0.0048(5) -0.0024(5) -0.0029(5) 
P2 0.0260(3) 0.0208(2) 0.0257(2) 0.00227(19) -0.0018(2) -0.00204(19) 
N3 0.0267(9) 0.0235(8) 0.0336(9) 0.0059(7) -0.0014(7) -0.0045(7) 
C4 0.0310(11) 0.0257(10) 0.0263(10) 0.0038(8) -0.0063(8) -0.0098(8) 
C5 0.0365(11) 0.0276(10) 0.0198(9) -0.0002(8) -0.0007(8) -0.0107(8) 
N6 0.0368(10) 0.0242(9) 0.0295(9) -0.0010(7) 0.0084(7) -0.0059(7) 
P7 0.0290(3) 0.0283(3) 0.0290(3) -0.0037(2) 0.0062(2) -0.0055(2) 
O8 0.0364(9) 0.0266(8) 0.0405(9) -0.0020(6) 0.0128(7) -0.0041(6) 
C9 0.0344(12) 0.0288(11) 0.0415(13) 0.0094(9) -0.0097(10) -0.0066(9) 
C10 0.0486(15) 0.0311(12) 0.0428(13) 0.0152(10) -0.0164(11) -0.0137(10) 
C11 0.0455(14) 0.0429(14) 0.0372(13) 0.0129(10) -0.0037(11) -0.0207(11) 
C12 0.0418(13) 0.0345(12) 0.0353(12) 0.0034(10) 0.0079(10) -0.0116(10) 
C13 0.0401(13) 0.0467(15) 0.0466(14) -0.0165(12) -0.0029(11) 0.0045(11) 
C14 0.0418(14) 0.0512(16) 0.0532(16) -0.0061(13) 0.0099(12) 0.0096(12) 
C15 0.061(3) 0.051(3) 0.038(2) -0.014(2) -0.010(2) 0.008(2) 
C16 0.0323(11) 0.0295(11) 0.0294(11) 0.0074(8) -0.0056(9) -0.0029(8) 
C17 0.0560(16) 0.0357(13) 0.0420(14) 0.0116(11) -0.0117(12) 0.0012(11) 
C18 0.0529(15) 0.0422(14) 0.0283(11) 0.0019(10) -0.0021(10) 0.0000(11) 
C19 0.0324(13) 0.0580(17) 0.0551(16) 0.0064(13) 0.0061(11) 0.0002(11) 
C20 0.042(2) 0.100(7) 0.059(3) 0.016(4) -0.015(2) -0.031(3) 
C21 0.047(2) 0.146(7) 0.053(3) 0.042(3) -0.0045(19) 0.010(3) 
C22 0.0424(13) 0.0426(13) 0.0305(11) -0.0107(10) 0.0129(10) -0.0143(10) 
C23 0.0550(18) 0.114(3) 0.0331(14) -0.0083(16) -0.0023(13) -0.0319(18) 
C24 0.111(3) 0.0536(18) 0.0562(19) -0.0264(15) 0.0332(19) -0.0121(18) 
N30 0.0358(10) 0.0300(9) 0.0225(8) -0.0035(7) -0.0055(7) 0.0027(7) 
Si31 0.065(2) 0.0318(10) 0.0262(8) -0.0085(5) -0.0081(7) -0.0127(9) 
C32 0.126(6) 0.057(3) 0.100(5) -0.032(3) 0.005(4) 0.006(4) 
C33 0.083(4) 0.081(4) 0.065(4) -0.004(3) -0.030(3) -0.040(3) 
Si34 0.0504(4) 0.0353(3) 0.0249(3) -0.0014(3) -0.0047(3) -0.0036(3) 
C35 0.110(3) 0.058(2) 0.0562(19) 0.0057(15) -0.0194(19) 0.0326(19) 
C36 0.072(2) 0.077(2) 0.0322(13) -0.0091(13) 0.0104(13) -0.0197(16) 
  
_geom_special_details 
; 
 All esds (except the esd in the dihedral angle between two l.s. planes) 
 are estimated using the full covariance matrix.  The cell esds are taken 
 into account individually in the estimation of esds in distances, angles 
 and torsion angles; correlations between esds in cell parameters are only 
 used when they are defined by crystal symmetry.  An approximate (isotropic) 
 treatment of cell esds is used for estimating esds involving l.s. planes. 
; 
  
loop_ 
 _geom_bond_atom_site_label_1 
 _geom_bond_atom_site_label_2 
 _geom_bond_distance 
 _geom_bond_site_symmetry_2 
 _geom_bond_publ_flag 
Y N30 2.2406(17) . ? 
Y O1 2.3121(13) 6_554 ? 
Y N6 2.3348(17) . ? 
Y O8 2.3409(15) . ? 
Y N3 2.3560(17) . ? 
Y O1 2.4720(13) . ? 
O1 P2 1.5559(14) . ? 
O1 Y 2.3121(13) 6_554 ? 
P2 N3 1.5989(18) . ? 
P2 C13 1.806(2) . ? 
P2 C16 1.821(2) . ? 
N3 C4 1.405(3) . ? 
C4 C9 1.388(3) . ? 
C4 C5 1.416(3) . ? 
C5 C12 1.389(3) . ? 
C5 N6 1.393(3) . ? 
N6 P7 1.5907(18) . ? 
P7 O8 1.5278(15) . ? 
P7 C22 1.807(2) . ? 
P7 C19 1.825(3) . ? 
C9 C10 1.399(3) . ? 
C10 C11 1.370(4) . ? 
C11 C12 1.384(3) . ? 
C13 C15' 1.403(6) . ? 
C13 C15 1.465(5) . ? 
C13 C14 1.510(4) . ? 
C16 C18 1.531(3) . ? 
C16 C17 1.533(3) . ? 
C19 C21' 1.420(11) . ? 
C19 C20' 1.434(11) . ? 
C19 C21 1.511(6) . ? 
C19 C20 1.538(6) . ? 
C22 C23 1.521(4) . ? 
C22 C24 1.529(4) . ? 
N30 Si34 1.6918(19) . ? 
N30 Si31 1.705(3) . ? 
N30 Si3" 1.712(9) . ? 
N30 Si3' 1.748(7) . ? 
Si31 C33 1.866(6) . ? 
Si31 C32 1.886(7) . ? 
Si3' C33' 1.850(11) . ? 
Si3' C32' 1.882(12) . ? 
Si3" C32" 1.849(12) . ? 
Si3" C33" 1.889(13) . ? 
Si34 C35 1.863(3) . ? 
Si34 C36 1.870(3) . ? 
C40 C41 1.557(19) . ? 
C41 C42 1.3900 . ? 
C41 C46 1.3900 . ? 
C42 C43 1.3900 . ? 
C43 C44 1.3900 . ? 
C44 C45 1.3900 . ? 
C45 C46 1.3900 . ? 
  
loop_ 
 _geom_angle_atom_site_label_1 
 _geom_angle_atom_site_label_2 
 _geom_angle_atom_site_label_3 
 _geom_angle 
 _geom_angle_site_symmetry_1 
 _geom_angle_site_symmetry_3 
 _geom_angle_publ_flag 
N30 Y O1 114.07(6) . 6_554 ? 
N30 Y N6 99.96(7) . . ? 
O1 Y N6 137.13(5) 6_554 . ? 
N30 Y O8 110.08(6) . . ? 
O1 Y O8 81.38(5) 6_554 . ? 
N6 Y O8 62.27(6) . . ? 
N30 Y N3 100.61(6) . . ? 
O1 Y N3 126.50(5) 6_554 . ? 
N6 Y N3 67.15(6) . . ? 
O8 Y N3 123.98(6) . . ? 
N30 Y O1 111.26(6) . . ? 
O1 Y O1 69.25(6) 6_554 . ? 
N6 Y O1 122.42(6) . . ? 
O8 Y O1 136.23(5) . . ? 
N3 Y O1 60.52(5) . . ? 
P2 O1 Y 150.07(8) . 6_554 ? 
P2 O1 Y 97.49(6) . . ? 
Y O1 Y 110.14(5) 6_554 . ? 
O1 P2 N3 101.02(8) . . ? 
O1 P2 C13 107.96(11) . . ? 
N3 P2 C13 114.73(10) . . ? 
O1 P2 C16 108.39(9) . . ? 
N3 P2 C16 115.11(10) . . ? 
C13 P2 C16 108.97(11) . . ? 
O1 P2 Y 52.54(5) . . ? 
N3 P2 Y 48.52(6) . . ? 
C13 P2 Y 126.56(9) . . ? 
C16 P2 Y 124.15(7) . . ? 
C4 N3 P2 133.50(15) . . ? 
C4 N3 Y 120.66(13) . . ? 
P2 N3 Y 100.92(8) . . ? 
C9 C4 N3 125.7(2) . . ? 
C9 C4 C5 119.30(19) . . ? 
N3 C4 C5 115.00(18) . . ? 
C12 C5 N6 126.2(2) . . ? 
C12 C5 C4 119.0(2) . . ? 
N6 C5 C4 114.80(17) . . ? 
C5 N6 P7 136.88(15) . . ? 
C5 N6 Y 122.11(13) . . ? 
P7 N6 Y 97.15(8) . . ? 
O8 P7 N6 101.64(9) . . ? 
O8 P7 C22 112.99(10) . . ? 
N6 P7 C22 112.50(11) . . ? 
O8 P7 C19 107.58(11) . . ? 
N6 P7 C19 115.88(12) . . ? 
C22 P7 C19 106.30(12) . . ? 
O8 P7 Y 50.82(6) . . ? 
N6 P7 Y 50.92(6) . . ? 
C22 P7 Y 130.50(8) . . ? 
C19 P7 Y 123.02(9) . . ? 
P7 O8 Y 98.78(7) . . ? 
C4 C9 C10 120.3(2) . . ? 
C11 C10 C9 120.2(2) . . ? 
C10 C11 C12 120.1(2) . . ? 
C11 C12 C5 121.0(2) . . ? 
C15' C13 C15 66.8(3) . . ? 
C15' C13 C14 115.3(3) . . ? 
C15 C13 C14 119.6(3) . . ? 
C15' C13 P2 121.5(3) . . ? 
C15 C13 P2 112.6(2) . . ? 
C14 C13 P2 113.49(17) . . ? 
C18 C16 C17 110.17(19) . . ? 
C18 C16 P2 108.64(15) . . ? 
C17 C16 P2 116.29(16) . . ? 
C21' C19 C20' 124.6(11) . . ? 
C21 C19 C20 108.2(6) . . ? 
C21' C19 P7 114.8(8) . . ? 
C20' C19 P7 118.1(9) . . ? 
C21 C19 P7 109.6(2) . . ? 
C20 C19 P7 112.0(4) . . ? 
C23 C22 C24 111.8(2) . . ? 
C23 C22 P7 110.66(17) . . ? 
C24 C22 P7 112.0(2) . . ? 
Si34 N30 Si31 123.03(16) . . ? 
Si34 N30 Si3" 122.6(5) . . ? 
Si34 N30 Si3' 117.9(3) . . ? 
Si34 N30 Y 118.09(9) . . ? 
Si31 N30 Y 118.71(15) . . ? 
Si3" N30 Y 119.0(5) . . ? 
Si3' N30 Y 122.9(3) . . ? 
N30 Si31 C33 113.9(3) . . ? 
N30 Si31 C32 113.2(3) . . ? 
C33 Si31 C32 106.0(4) . . ? 
N30 Si3' C33' 115.8(7) . . ? 
N30 Si3' C32' 111.1(6) . . ? 
C33' Si3' C32' 105.2(8) . . ? 
N30 Si3" C32" 117.2(8) . . ? 
N30 Si3" C33" 113.8(9) . . ? 
C32" Si3" C33" 105.0(8) . . ? 
N30 Si34 C35 114.07(14) . . ? 
N30 Si34 C36 114.75(12) . . ? 
C35 Si34 C36 106.05(15) . . ? 
C42 C41 C46 120.0 . . ? 
C42 C41 C40 121.1(7) . . ? 
C46 C41 C40 118.9(7) . . ? 
C43 C42 C41 120.0 . . ? 
C42 C43 C44 120.0 . . ? 
C45 C44 C43 120.0 . . ? 
C46 C45 C44 120.0 . . ? 
C45 C46 C41 120.0 . . ? 
  
_diffrn_measured_fraction_theta_max    0.958 
_diffrn_reflns_theta_full              31.50 
_diffrn_measured_fraction_theta_full   0.987 
_refine_diff_density_max    0.630 
_refine_diff_density_min   -0.301 
_refine_diff_density_rms    0.073 
  
#===END

  
data_Compound_14
  
_audit_creation_method            SHELXL-97 
_chemical_name_systematic 
; 
 ? 
; 
_chemical_name_common             ? 
_chemical_melting_point           ? 
_chemical_formula_moiety
 'C66 H88 N6 O4 P4 Si4 Y2, 2(C7 H8)'
_chemical_formula_sum 
 'C80 H104 N6 O4 P4 Si4 Y2' 
_chemical_formula_weight          1627.75 
  
loop_ 
 _atom_type_symbol 
 _atom_type_description 
 _atom_type_scat_dispersion_real 
 _atom_type_scat_dispersion_imag 
 _atom_type_scat_source 
 'C'  'C'   0.0181   0.0091 
 'International Tables Vol C Tables 4.2.6.8 and 6.1.1.4' 
 'H'  'H'   0.0000   0.0000 
 'International Tables Vol C Tables 4.2.6.8 and 6.1.1.4' 
 'N'  'N'   0.0311   0.0180 
 'International Tables Vol C Tables 4.2.6.8 and 6.1.1.4' 
 'O'  'O'   0.0492   0.0322 
 'International Tables Vol C Tables 4.2.6.8 and 6.1.1.4' 
 'Si'  'Si'   0.2541   0.3302 
 'International Tables Vol C Tables 4.2.6.8 and 6.1.1.4' 
 'P'  'P'   0.2955   0.4335 
 'International Tables Vol C Tables 4.2.6.8 and 6.1.1.4' 
 'Y'  'Y'  -0.2670   2.0244 
 'International Tables Vol C Tables 4.2.6.8 and 6.1.1.4' 
  
_symmetry_cell_setting            Monoclinic 
_symmetry_space_group_name_H-M    P2(1)/n 
  
loop_ 
 _symmetry_equiv_pos_as_xyz 
 'x, y, z' 
 '-x+1/2, y+1/2, -z+1/2' 
 '-x, -y, -z' 
 'x-1/2, -y-1/2, z-1/2' 
  
_cell_length_a                  14.23934(5) 
_cell_length_b                  18.35109(5) 
_cell_length_c                  16.82037(6) 
_cell_angle_alpha               90
_cell_angle_beta                109.9403(4) 
_cell_angle_gamma               90
_cell_volume                      4131.78(3)
_cell_formula_units_Z             2 
_cell_measurement_temperature     173(2) 
_cell_measurement_reflns_used     40035 
_cell_measurement_theta_min       2.4058 
_cell_measurement_theta_max       71.2740 
  
_exptl_crystal_description        blocks 
_exptl_crystal_colour             Colourless 
_exptl_crystal_size_max           0.25 
_exptl_crystal_size_mid           0.22 
_exptl_crystal_size_min           0.21 
_exptl_crystal_density_meas       ? 
_exptl_crystal_density_diffrn     1.308 
_exptl_crystal_density_method     'not measured' 
_exptl_crystal_F_000              1704 
_exptl_absorpt_coefficient_mu     3.558 
_exptl_absorpt_correction_type    multi-scan 
_exptl_absorpt_correction_T_min   0.87276 
_exptl_absorpt_correction_T_max   1.00000 
_exptl_absorpt_process_details     
; 
CrysAlis RED, Oxford Diffraction Ltd., 
Version 1.171.32.5 (release 08-05-2007 CrysAlis171 .NET) 
(compiled May  8 2007,13:10:02) 
Empirical absorption correction using spherical harmonics, 
implemented in SCALE3 ABSPACK scaling algorithm. 
; 
  
_exptl_special_details 
; 
 ? 
; 
  
_diffrn_ambient_temperature       173(2) 
_diffrn_radiation_wavelength      1.54184 
_diffrn_radiation_type            CuK\a 
_diffrn_radiation_source         'Enhance Ultra (Cu) X-ray Source'
_diffrn_radiation_monochromator   graphite 
_diffrn_measurement_device_type   'OD Xcalibur PX Ultra' 
_diffrn_measurement_method        'phi and omega scans' 
_diffrn_detector_area_resol_mean  8.2556 
_diffrn_standards_number          0 
_diffrn_standards_interval_count  ? 
_diffrn_standards_interval_time   ? 
_diffrn_standards_decay_%         ? 
_diffrn_reflns_number             61037 
_diffrn_reflns_av_R_equivalents   0.0251 
_diffrn_reflns_av_sigmaI/netI     0.0129 
_diffrn_reflns_limit_h_min        -17 
_diffrn_reflns_limit_h_max        17 
_diffrn_reflns_limit_k_min        -22 
_diffrn_reflns_limit_k_max        22 
_diffrn_reflns_limit_l_min        -20 
_diffrn_reflns_limit_l_max        20 
_diffrn_reflns_theta_min          3.52 
_diffrn_reflns_theta_max          71.42 
_reflns_number_total              7978 
_reflns_number_gt                 7151 
_reflns_threshold_expression      >2sigma(I) 
  
_computing_data_collection        'CrysAlis CCD, Oxford Diffraction Ltd' 
_computing_cell_refinement        'CrysAlis RED, Oxford Diffraction Ltd' 
_computing_data_reduction         'CrysAlis RED, Oxford Diffraction Ltd' 
_computing_structure_solution     'SHELXS-97 (Sheldrick, 1990)' 
_computing_structure_refinement   'SHELXL-97 (Sheldrick, 1997)' 
_computing_molecular_graphics     'Bruker SHELXTL' 
_computing_publication_material   'Bruker SHELXTL' 
  
_refine_special_details 
; 
 Refinement of F^2^ against ALL reflections.  The weighted R-factor wR and 
 goodness of fit S are based on F^2^, conventional R-factors R are based 
 on F, with F set to zero for negative F^2^. The threshold expression of 
 F^2^ > 2sigma(F^2^) is used only for calculating R-factors(gt) etc. and is 
 not relevant to the choice of reflections for refinement.  R-factors based 
 on F^2^ are statistically about twice as large as those based on F, and R- 
 factors based on ALL data will be even larger. 
; 
  
_refine_ls_structure_factor_coef  Fsqd 
_refine_ls_matrix_type            full 
_refine_ls_weighting_scheme       calc 
_refine_ls_weighting_details 
 'calc w=1/[\s^2^(Fo^2^)+(0.0468P)^2^+0.4531P] where P=(Fo^2^+2Fc^2^)/3' 
_atom_sites_solution_primary      direct 
_atom_sites_solution_secondary    difmap 
_atom_sites_solution_hydrogens    geom 
_refine_ls_hydrogen_treatment     mixed 
_refine_ls_extinction_method      SHELXL 
_refine_ls_extinction_coef        0.00017(4) 
_refine_ls_extinction_expression 
 'Fc^*^=kFc[1+0.001xFc^2^\l^3^/sin(2\q)]^-1/4^' 
_refine_ls_number_reflns          7978 
_refine_ls_number_parameters      461 
_refine_ls_number_restraints      2 
_refine_ls_R_factor_all           0.0269 
_refine_ls_R_factor_gt            0.0236 
_refine_ls_wR_factor_ref          0.0674 
_refine_ls_wR_factor_gt           0.0663 
_refine_ls_goodness_of_fit_ref    1.083 
_refine_ls_restrained_S_all       1.083 
_refine_ls_shift/su_max           0.002 
_refine_ls_shift/su_mean          0.000 
  
loop_ 
 _atom_site_label 
 _atom_site_type_symbol 
 _atom_site_fract_x 
 _atom_site_fract_y 
 _atom_site_fract_z 
 _atom_site_U_iso_or_equiv 
 _atom_site_adp_type 
 _atom_site_occupancy 
 _atom_site_symmetry_multiplicity 
 _atom_site_calc_flag 
 _atom_site_refinement_flags 
 _atom_site_disorder_assembly 
 _atom_site_disorder_group 
Y Y 0.411801(9) 0.570901(7) 0.517055(7) 0.01934(6) Uani 1 1 d . . . 
O1 O 0.52332(7) 0.54294(5) 0.43692(6) 0.0212(2) Uani 1 1 d . . . 
P2 P 0.51576(3) 0.61899(2) 0.39572(2) 0.02006(8) Uani 1 1 d . . . 
N3 N 0.45345(9) 0.66501(7) 0.43992(8) 0.0232(3) Uani 1 1 d . . . 
C4 C 0.41981(12) 0.74090(8) 0.42971(10) 0.0264(3) Uani 1 1 d . . . 
H4A H 0.3466 0.7417 0.4005 0.032 Uiso 1 1 calc R . . 
H4B H 0.4509 0.7661 0.3929 0.032 Uiso 1 1 calc R . . 
C5 C 0.44458(13) 0.78383(8) 0.51340(10) 0.0300(3) Uani 1 1 d . . . 
C6 C 0.38194(13) 0.75674(9) 0.56591(11) 0.0303(3) Uani 1 1 d . . . 
H6A H 0.3995 0.7856 0.6187 0.036 Uiso 1 1 calc R . . 
H6B H 0.3104 0.7653 0.5336 0.036 Uiso 1 1 calc R . . 
N7 N 0.39653(10) 0.67957(7) 0.58760(8) 0.0239(3) Uani 1 1 d . . . 
P8 P 0.35805(3) 0.64074(2) 0.65540(2) 0.02265(9) Uani 1 1 d . . . 
O9 O 0.35583(8) 0.55997(6) 0.63308(7) 0.0251(2) Uani 1 1 d . . . 
C10 C 0.45886(11) 0.61156(8) 0.28206(9) 0.0233(3) Uani 1 1 d . . . 
C11 C 0.38039(12) 0.65794(9) 0.23890(10) 0.0299(3) Uani 1 1 d . . . 
H11A H 0.3549 0.6913 0.2697 0.036 Uiso 1 1 calc R . . 
C12 C 0.33939(13) 0.65570(10) 0.15133(11) 0.0352(4) Uani 1 1 d . . . 
H12A H 0.2864 0.6878 0.1223 0.042 Uiso 1 1 calc R . . 
C13 C 0.37570(14) 0.60675(10) 0.10652(10) 0.0352(4) Uani 1 1 d . . . 
H13A H 0.3477 0.6051 0.0466 0.042 Uiso 1 1 calc R . . 
C14 C 0.45325(14) 0.55983(10) 0.14916(11) 0.0352(4) Uani 1 1 d . . . 
H14A H 0.4777 0.5259 0.1183 0.042 Uiso 1 1 calc R . . 
C15 C 0.49496(13) 0.56248(9) 0.23659(10) 0.0302(3) Uani 1 1 d . . . 
H15A H 0.5483 0.5307 0.2654 0.036 Uiso 1 1 calc R . . 
C16 C 0.63986(11) 0.65163(9) 0.40734(9) 0.0250(3) Uani 1 1 d . . . 
C17 C 0.71690(13) 0.60348(9) 0.41196(12) 0.0338(4) Uani 1 1 d . . . 
H17A H 0.7061 0.5524 0.4126 0.041 Uiso 1 1 calc R . . 
C18 C 0.80987(13) 0.62994(11) 0.41561(13) 0.0404(4) Uani 1 1 d . . . 
H18A H 0.8620 0.5967 0.4182 0.048 Uiso 1 1 calc R . . 
C19 C 0.82712(13) 0.70388(11) 0.41548(12) 0.0398(4) Uani 1 1 d . . . 
H19A H 0.8910 0.7215 0.4185 0.048 Uiso 1 1 calc R . . 
C20 C 0.75119(15) 0.75206(10) 0.41093(13) 0.0422(4) Uani 1 1 d . . . 
H20A H 0.7628 0.8030 0.4111 0.051 Uiso 1 1 calc R . . 
C21 C 0.65778(13) 0.72624(9) 0.40610(12) 0.0349(4) Uani 1 1 d . . . 
H21A H 0.6055 0.7598 0.4019 0.042 Uiso 1 1 calc R . . 
C22 C 0.55550(14) 0.77918(10) 0.56519(11) 0.0386(4) Uani 1 1 d . . . 
H22A H 0.5947 0.7967 0.5311 0.058 Uiso 1 1 calc R . . 
H22B H 0.5733 0.7285 0.5818 0.058 Uiso 1 1 calc R . . 
H22C H 0.5698 0.8094 0.6160 0.058 Uiso 1 1 calc R . . 
C23 C 0.41415(18) 0.86350(10) 0.48962(13) 0.0471(5) Uani 1 1 d . . . 
H23A H 0.3428 0.8657 0.4561 0.071 Uiso 1 1 calc R . . 
H23B H 0.4531 0.8831 0.4564 0.071 Uiso 1 1 calc R . . 
H23C H 0.4272 0.8924 0.5412 0.071 Uiso 1 1 calc R . . 
C24 C 0.43907(12) 0.65578(9) 0.76347(10) 0.0274(3) Uani 1 1 d . . . 
C25 C 0.52598(14) 0.69568(11) 0.77904(11) 0.0393(4) Uani 1 1 d . . . 
H25A H 0.5426 0.7148 0.7330 0.047 Uiso 1 1 calc R . . 
C26 C 0.58932(16) 0.70806(12) 0.86179(12) 0.0482(5) Uani 1 1 d . . . 
H26A H 0.6483 0.7362 0.8720 0.058 Uiso 1 1 calc R . . 
C27 C 0.56623(15) 0.67952(11) 0.92869(11) 0.0432(4) Uani 1 1 d . . . 
H27A H 0.6090 0.6883 0.9851 0.052 Uiso 1 1 calc R . . 
C28 C 0.48124(15) 0.63837(11) 0.91375(11) 0.0412(4) Uani 1 1 d . . . 
H28A H 0.4664 0.6177 0.9599 0.049 Uiso 1 1 calc R . . 
C29 C 0.41691(13) 0.62676(10) 0.83157(11) 0.0344(4) Uani 1 1 d . . . 
H29A H 0.3577 0.5990 0.8218 0.041 Uiso 1 1 calc R . . 
C30 C 0.23658(12) 0.67159(9) 0.65240(10) 0.0271(3) Uani 1 1 d . . . 
C31 C 0.22440(14) 0.73691(10) 0.68983(12) 0.0369(4) Uani 1 1 d . . . 
H31A H 0.2813 0.7644 0.7218 0.044 Uiso 1 1 calc R . . 
C32 C 0.12853(16) 0.76202(11) 0.68039(14) 0.0462(5) Uani 1 1 d . . . 
H32A H 0.1203 0.8065 0.7062 0.055 Uiso 1 1 calc R . . 
C33 C 0.04602(15) 0.72238(12) 0.63366(14) 0.0492(5) Uani 1 1 d . . . 
H33A H -0.0191 0.7397 0.6269 0.059 Uiso 1 1 calc R . . 
C34 C 0.05787(14) 0.65795(13) 0.59691(14) 0.0475(5) Uani 1 1 d . . . 
H34A H 0.0007 0.6308 0.5649 0.057 Uiso 1 1 calc R . . 
C35 C 0.15228(13) 0.63209(10) 0.60596(11) 0.0362(4) Uani 1 1 d . . . 
H35A H 0.1596 0.5873 0.5804 0.043 Uiso 1 1 calc R . . 
N40 N 0.28831(9) 0.51709(7) 0.40828(8) 0.0263(3) Uani 1 1 d . . . 
Si41 Si 0.18607(3) 0.57090(2) 0.38702(3) 0.02870(10) Uani 1 1 d D . . 
H41 H 0.2223(14) 0.6324(7) 0.4433(10) 0.039(5) Uiso 1 1 d D . . 
C42 C 0.13398(16) 0.60935(12) 0.27747(12) 0.0493(5) Uani 1 1 d . . . 
H42A H 0.1879 0.6319 0.2622 0.074 Uiso 1 1 calc R . . 
H42B H 0.0834 0.6462 0.2755 0.074 Uiso 1 1 calc R . . 
H42C H 0.1034 0.5701 0.2374 0.074 Uiso 1 1 calc R . . 
C43 C 0.07835(14) 0.52929(12) 0.41037(14) 0.0472(5) Uani 1 1 d . . . 
H43A H 0.1019 0.5085 0.4674 0.071 Uiso 1 1 calc R . . 
H43B H 0.0486 0.4908 0.3691 0.071 Uiso 1 1 calc R . . 
H43C H 0.0281 0.5668 0.4068 0.071 Uiso 1 1 calc R . . 
Si44 Si 0.30082(3) 0.44274(2) 0.35290(3) 0.02756(10) Uani 1 1 d D . . 
H44 H 0.4035(5) 0.4180(10) 0.3878(11) 0.036(5) Uiso 1 1 d D . . 
C45 C 0.22343(15) 0.36209(10) 0.35991(12) 0.0415(4) Uani 1 1 d . . . 
H45A H 0.2343 0.3513 0.4194 0.062 Uiso 1 1 calc R . . 
H45B H 0.2429 0.3198 0.3334 0.062 Uiso 1 1 calc R . . 
H45C H 0.1526 0.3730 0.3305 0.062 Uiso 1 1 calc R . . 
C46 C 0.27511(15) 0.45785(11) 0.23752(11) 0.0409(4) Uani 1 1 d . . . 
H46A H 0.3139 0.4997 0.2299 0.061 Uiso 1 1 calc R . . 
H46B H 0.2037 0.4674 0.2093 0.061 Uiso 1 1 calc R . . 
H46C H 0.2943 0.4143 0.2129 0.061 Uiso 1 1 calc R . . 
C50 C 0.9458(2) 0.41489(16) 0.18728(19) 0.0744(8) Uani 1 1 d . . . 
H50A H 0.9522 0.3916 0.1370 0.112 Uiso 1 1 calc R . . 
H50B H 0.9356 0.3775 0.2251 0.112 Uiso 1 1 calc R . . 
H50C H 1.0068 0.4424 0.2167 0.112 Uiso 1 1 calc R . . 
C51 C 0.85842(16) 0.46560(12) 0.16130(15) 0.0491(5) Uani 1 1 d . . . 
C52 C 0.82405(18) 0.49898(14) 0.21978(15) 0.0564(6) Uani 1 1 d . . . 
H52A H 0.8563 0.4888 0.2782 0.068 Uiso 1 1 calc R . . 
C53 C 0.74456(19) 0.54649(15) 0.19614(15) 0.0604(6) Uani 1 1 d . . . 
H53A H 0.7233 0.5692 0.2379 0.072 Uiso 1 1 calc R . . 
C54 C 0.69585(19) 0.56104(13) 0.11172(15) 0.0551(5) Uani 1 1 d . . . 
H54A H 0.6399 0.5929 0.0946 0.066 Uiso 1 1 calc R . . 
C55 C 0.72965(18) 0.52855(12) 0.05234(14) 0.0547(5) Uani 1 1 d . . . 
H55A H 0.6971 0.5390 -0.0059 0.066 Uiso 1 1 calc R . . 
C56 C 0.80941(18) 0.48142(12) 0.07593(15) 0.0540(5) Uani 1 1 d . . . 
H56A H 0.8312 0.4596 0.0341 0.065 Uiso 1 1 calc R . . 
  
loop_ 
 _atom_site_aniso_label 
 _atom_site_aniso_U_11 
 _atom_site_aniso_U_22 
 _atom_site_aniso_U_33 
 _atom_site_aniso_U_23 
 _atom_site_aniso_U_13 
 _atom_site_aniso_U_12 
Y 0.02055(8) 0.01865(8) 0.01989(8) -0.00005(4) 0.00828(5) 0.00126(4) 
O1 0.0215(5) 0.0202(5) 0.0230(5) 0.0021(4) 0.0089(4) 0.0011(4) 
P2 0.02172(18) 0.01977(18) 0.01950(17) 0.00103(13) 0.00807(14) -0.00003(14) 
N3 0.0277(6) 0.0213(6) 0.0225(6) 0.0012(5) 0.0108(5) 0.0012(5) 
C4 0.0307(8) 0.0231(7) 0.0267(8) 0.0029(6) 0.0113(6) 0.0035(6) 
C5 0.0415(9) 0.0202(8) 0.0330(8) -0.0019(6) 0.0189(7) -0.0006(7) 
C6 0.0399(9) 0.0225(8) 0.0335(9) -0.0002(6) 0.0189(7) 0.0046(7) 
N7 0.0290(7) 0.0208(6) 0.0240(6) -0.0008(5) 0.0116(5) 0.0012(5) 
P8 0.02496(19) 0.02298(19) 0.02202(18) -0.00106(14) 0.01062(15) 0.00259(14) 
O9 0.0294(6) 0.0240(5) 0.0251(5) 0.0000(4) 0.0132(5) 0.0015(4) 
C10 0.0246(7) 0.0239(7) 0.0223(7) 0.0015(6) 0.0090(6) -0.0023(6) 
C11 0.0308(8) 0.0299(8) 0.0282(8) -0.0007(6) 0.0088(7) 0.0048(7) 
C12 0.0343(9) 0.0355(9) 0.0294(8) 0.0031(7) 0.0026(7) 0.0051(7) 
C13 0.0384(9) 0.0426(10) 0.0219(8) 0.0008(7) 0.0070(7) -0.0031(8) 
C14 0.0387(10) 0.0416(10) 0.0265(8) -0.0049(7) 0.0125(7) 0.0036(8) 
C15 0.0303(8) 0.0337(9) 0.0260(8) 0.0005(6) 0.0088(7) 0.0052(7) 
C16 0.0258(8) 0.0291(8) 0.0202(7) 0.0012(6) 0.0082(6) -0.0031(6) 
C17 0.0281(8) 0.0282(9) 0.0452(10) 0.0027(7) 0.0127(7) -0.0018(7) 
C18 0.0258(9) 0.0440(10) 0.0522(11) 0.0041(9) 0.0146(8) 0.0008(8) 
C19 0.0276(9) 0.0478(11) 0.0442(10) 0.0035(8) 0.0125(8) -0.0123(8) 
C20 0.0445(11) 0.0313(9) 0.0551(12) 0.0003(8) 0.0227(9) -0.0117(8) 
C21 0.0355(9) 0.0284(8) 0.0450(10) 0.0005(7) 0.0194(8) -0.0025(7) 
C22 0.0437(10) 0.0403(10) 0.0329(9) -0.0110(7) 0.0146(8) -0.0136(8) 
C23 0.0788(15) 0.0225(9) 0.0530(12) 0.0018(8) 0.0394(11) 0.0029(9) 
C24 0.0308(8) 0.0273(8) 0.0249(8) -0.0017(6) 0.0106(6) 0.0057(6) 
C25 0.0395(10) 0.0456(10) 0.0301(9) 0.0020(8) 0.0083(7) -0.0065(8) 
C26 0.0430(11) 0.0522(12) 0.0386(10) -0.0008(9) -0.0001(8) -0.0103(9) 
C27 0.0466(11) 0.0481(11) 0.0258(8) -0.0037(8) 0.0005(8) 0.0100(9) 
C28 0.0456(11) 0.0535(12) 0.0260(9) 0.0049(8) 0.0139(8) 0.0120(9) 
C29 0.0358(9) 0.0401(9) 0.0298(8) 0.0010(7) 0.0143(7) 0.0045(7) 
C30 0.0285(8) 0.0301(8) 0.0251(7) 0.0025(6) 0.0124(6) 0.0048(6) 
C31 0.0404(10) 0.0345(9) 0.0402(10) -0.0036(7) 0.0195(8) 0.0058(8) 
C32 0.0539(12) 0.0406(10) 0.0555(12) 0.0049(9) 0.0335(10) 0.0180(9) 
C33 0.0358(10) 0.0602(13) 0.0593(13) 0.0169(10) 0.0262(10) 0.0188(9) 
C34 0.0272(9) 0.0619(13) 0.0527(12) 0.0042(10) 0.0126(8) 0.0011(9) 
C35 0.0329(9) 0.0399(10) 0.0368(9) -0.0011(7) 0.0132(7) 0.0008(7) 
N40 0.0225(6) 0.0287(7) 0.0255(6) 0.0001(5) 0.0053(5) -0.0003(5) 
Si41 0.0240(2) 0.0320(2) 0.0274(2) -0.00010(17) 0.00521(17) 0.00278(17) 
C42 0.0477(12) 0.0558(13) 0.0372(10) 0.0088(9) 0.0050(9) 0.0170(10) 
C43 0.0291(9) 0.0601(13) 0.0527(12) -0.0076(10) 0.0145(8) -0.0035(9) 
Si44 0.0245(2) 0.0275(2) 0.0273(2) -0.00306(17) 0.00449(17) -0.00158(17) 
C45 0.0447(11) 0.0340(9) 0.0400(10) -0.0014(8) 0.0070(8) -0.0090(8) 
C46 0.0472(11) 0.0426(10) 0.0322(9) -0.0072(8) 0.0128(8) -0.0055(9) 
C50 0.0677(18) 0.0714(17) 0.0781(19) -0.0110(14) 0.0171(15) 0.0070(14) 
C51 0.0442(11) 0.0412(11) 0.0584(13) -0.0037(9) 0.0130(10) -0.0078(9) 
C52 0.0542(13) 0.0671(15) 0.0455(12) 0.0070(11) 0.0139(10) -0.0012(11) 
C53 0.0600(14) 0.0728(16) 0.0516(13) 0.0038(12) 0.0233(11) 0.0087(12) 
C54 0.0556(14) 0.0559(13) 0.0521(13) 0.0036(10) 0.0163(11) 0.0027(10) 
C55 0.0621(14) 0.0493(12) 0.0459(12) 0.0018(10) 0.0098(10) -0.0047(11) 
C56 0.0598(14) 0.0482(12) 0.0539(13) -0.0094(10) 0.0192(11) -0.0086(10) 
  
_geom_special_details 
; 
 All esds (except the esd in the dihedral angle between two l.s. planes) 
 are estimated using the full covariance matrix.  The cell esds are taken 
 into account individually in the estimation of esds in distances, angles 
 and torsion angles; correlations between esds in cell parameters are only 
 used when they are defined by crystal symmetry.  An approximate (isotropic) 
 treatment of cell esds is used for estimating esds involving l.s. planes. 
; 
  
loop_ 
 _geom_bond_atom_site_label_1 
 _geom_bond_atom_site_label_2 
 _geom_bond_distance 
 _geom_bond_site_symmetry_2 
 _geom_bond_publ_flag 
Y N40 2.2848(13) . ? 
Y O1 2.3085(10) 3_666 ? 
Y N3 2.3542(12) . ? 
Y O9 2.3548(10) . ? 
Y N7 2.3681(12) . ? 
Y O1 2.4621(10) . ? 
O1 P2 1.5455(10) . ? 
O1 Y 2.3085(10) 3_666 ? 
P2 N3 1.5821(12) . ? 
P2 C10 1.8092(15) . ? 
P2 C16 1.8122(16) . ? 
N3 C4 1.4638(19) . ? 
C4 C5 1.545(2) . ? 
C5 C22 1.524(3) . ? 
C5 C6 1.536(2) . ? 
C5 C23 1.538(2) . ? 
C6 N7 1.4594(19) . ? 
N7 P8 1.5922(13) . ? 
P8 O9 1.5268(11) . ? 
P8 C30 1.8043(16) . ? 
P8 C24 1.8114(16) . ? 
C10 C15 1.389(2) . ? 
C10 C11 1.395(2) . ? 
C11 C12 1.388(2) . ? 
C12 C13 1.381(3) . ? 
C13 C14 1.391(3) . ? 
C14 C15 1.386(2) . ? 
C16 C17 1.390(2) . ? 
C16 C21 1.394(2) . ? 
C17 C18 1.391(2) . ? 
C18 C19 1.379(3) . ? 
C19 C20 1.378(3) . ? 
C20 C21 1.388(3) . ? 
C24 C25 1.384(2) . ? 
C24 C29 1.393(2) . ? 
C25 C26 1.395(3) . ? 
C26 C27 1.379(3) . ? 
C27 C28 1.375(3) . ? 
C28 C29 1.390(3) . ? 
C30 C35 1.392(2) . ? 
C30 C31 1.392(2) . ? 
C31 C32 1.398(3) . ? 
C32 C33 1.378(3) . ? 
C33 C34 1.371(3) . ? 
C34 C35 1.384(3) . ? 
N40 Si41 1.6932(13) . ? 
N40 Si44 1.6955(14) . ? 
Si41 C43 1.871(2) . ? 
Si41 C42 1.874(2) . ? 
Si44 C46 1.8688(18) . ? 
Si44 C45 1.8728(19) . ? 
C50 C51 1.494(3) . ? 
C51 C52 1.382(3) . ? 
C51 C56 1.396(3) . ? 
C52 C53 1.376(3) . ? 
C53 C54 1.377(3) . ? 
C54 C55 1.383(3) . ? 
C55 C56 1.374(3) . ? 
  
loop_ 
 _geom_angle_atom_site_label_1 
 _geom_angle_atom_site_label_2 
 _geom_angle_atom_site_label_3 
 _geom_angle 
 _geom_angle_site_symmetry_1 
 _geom_angle_site_symmetry_3 
 _geom_angle_publ_flag 
N40 Y O1 89.32(4) . 3_666 ? 
N40 Y N3 98.37(4) . . ? 
O1 Y N3 134.54(4) 3_666 . ? 
N40 Y O9 103.96(4) . . ? 
O1 Y O9 81.65(4) 3_666 . ? 
N3 Y O9 137.67(4) . . ? 
N40 Y N7 126.02(5) . . ? 
O1 Y N7 133.52(4) 3_666 . ? 
N3 Y N7 75.04(4) . . ? 
O9 Y N7 62.72(4) . . ? 
N40 Y O1 86.30(4) . . ? 
O1 Y O1 74.69(4) 3_666 . ? 
N3 Y O1 61.34(4) . . ? 
O9 Y O1 154.12(4) . . ? 
N7 Y O1 129.52(4) . . ? 
P2 O1 Y 157.86(6) . 3_666 ? 
P2 O1 Y 95.62(5) . . ? 
Y O1 Y 105.31(4) 3_666 . ? 
O1 P2 N3 103.64(6) . . ? 
O1 P2 C10 110.08(6) . . ? 
N3 P2 C10 114.58(7) . . ? 
O1 P2 C16 109.50(6) . . ? 
N3 P2 C16 117.09(7) . . ? 
C10 P2 C16 101.99(7) . . ? 
O1 P2 Y 53.90(4) . . ? 
N3 P2 Y 50.09(5) . . ? 
C10 P2 Y 122.94(5) . . ? 
C16 P2 Y 134.87(5) . . ? 
C4 N3 P2 131.78(11) . . ? 
C4 N3 Y 128.96(9) . . ? 
P2 N3 Y 98.89(6) . . ? 
N3 C4 C5 114.48(13) . . ? 
C22 C5 C6 110.18(14) . . ? 
C22 C5 C23 110.30(15) . . ? 
C6 C5 C23 106.84(14) . . ? 
C22 C5 C4 111.24(13) . . ? 
C6 C5 C4 111.21(13) . . ? 
C23 C5 C4 106.93(14) . . ? 
N7 C6 C5 113.37(13) . . ? 
C6 N7 P8 123.98(10) . . ? 
C6 N7 Y 136.17(10) . . ? 
P8 N7 Y 95.44(6) . . ? 
O9 P8 N7 103.99(6) . . ? 
O9 P8 C30 111.01(7) . . ? 
N7 P8 C30 113.61(7) . . ? 
O9 P8 C24 110.33(7) . . ? 
N7 P8 C24 113.18(7) . . ? 
C30 P8 C24 104.87(7) . . ? 
O9 P8 Y 51.61(4) . . ? 
N7 P8 Y 52.38(5) . . ? 
C30 P8 Y 127.80(5) . . ? 
C24 P8 Y 127.20(5) . . ? 
P8 O9 Y 97.85(5) . . ? 
C15 C10 C11 119.35(14) . . ? 
C15 C10 P2 120.96(12) . . ? 
C11 C10 P2 119.63(12) . . ? 
C12 C11 C10 120.44(15) . . ? 
C13 C12 C11 119.88(16) . . ? 
C12 C13 C14 120.01(16) . . ? 
C15 C14 C13 120.19(16) . . ? 
C14 C15 C10 120.12(16) . . ? 
C17 C16 C21 118.69(15) . . ? 
C17 C16 P2 121.19(12) . . ? 
C21 C16 P2 119.98(13) . . ? 
C16 C17 C18 120.10(16) . . ? 
C19 C18 C17 120.70(17) . . ? 
C20 C19 C18 119.63(16) . . ? 
C19 C20 C21 120.15(17) . . ? 
C20 C21 C16 120.72(17) . . ? 
C25 C24 C29 119.03(16) . . ? 
C25 C24 P8 119.53(13) . . ? 
C29 C24 P8 121.43(13) . . ? 
C24 C25 C26 120.47(17) . . ? 
C27 C26 C25 119.96(19) . . ? 
C28 C27 C26 119.96(17) . . ? 
C27 C28 C29 120.43(17) . . ? 
C28 C29 C24 120.12(17) . . ? 
C35 C30 C31 119.06(16) . . ? 
C35 C30 P8 119.17(13) . . ? 
C31 C30 P8 121.58(13) . . ? 
C30 C31 C32 120.01(18) . . ? 
C33 C32 C31 120.04(18) . . ? 
C34 C33 C32 120.03(18) . . ? 
C33 C34 C35 120.7(2) . . ? 
C34 C35 C30 120.17(18) . . ? 
Si41 N40 Si44 126.67(8) . . ? 
Si41 N40 Y 106.77(6) . . ? 
Si44 N40 Y 126.26(7) . . ? 
N40 Si41 C43 115.14(9) . . ? 
N40 Si41 C42 116.80(8) . . ? 
C43 Si41 C42 106.39(10) . . ? 
N40 Si44 C46 115.54(8) . . ? 
N40 Si44 C45 115.28(8) . . ? 
C46 Si44 C45 105.75(9) . . ? 
C52 C51 C56 117.8(2) . . ? 
C52 C51 C50 122.0(2) . . ? 
C56 C51 C50 120.3(2) . . ? 
C53 C52 C51 122.1(2) . . ? 
C52 C53 C54 119.8(2) . . ? 
C53 C54 C55 119.0(2) . . ? 
C56 C55 C54 121.3(2) . . ? 
C55 C56 C51 120.1(2) . . ? 
  
_diffrn_measured_fraction_theta_max    0.990 
_diffrn_reflns_theta_full              71.42 
_diffrn_measured_fraction_theta_full   0.990 
_refine_diff_density_max    0.377 
_refine_diff_density_min   -0.345 
_refine_diff_density_rms    0.048 
  
#===END

  
data_Compound_16
  
_audit_creation_method            SHELXL-97 
_chemical_name_systematic 
; 
 ? 
; 
_chemical_name_common             ? 
_chemical_melting_point           ? 
_chemical_formula_moiety
 'C68 H88 N6 O4 P4 Si4 Y2' 
_chemical_formula_sum 
 'C68 H88 N6 O4 P4 Si4 Y2' 
_chemical_formula_weight          1467.50 
  
loop_ 
 _atom_type_symbol 
 _atom_type_description 
 _atom_type_scat_dispersion_real 
 _atom_type_scat_dispersion_imag 
 _atom_type_scat_source 
 'C'  'C'   0.0033   0.0016 
 'International Tables Vol C Tables 4.2.6.8 and 6.1.1.4' 
 'H'  'H'   0.0000   0.0000 
 'International Tables Vol C Tables 4.2.6.8 and 6.1.1.4' 
 'N'  'N'   0.0061   0.0033 
 'International Tables Vol C Tables 4.2.6.8 and 6.1.1.4' 
 'O'  'O'   0.0106   0.0060 
 'International Tables Vol C Tables 4.2.6.8 and 6.1.1.4' 
 'Si'  'Si'   0.0817   0.0704 
 'International Tables Vol C Tables 4.2.6.8 and 6.1.1.4' 
 'P'  'P'   0.1023   0.0942 
 'International Tables Vol C Tables 4.2.6.8 and 6.1.1.4' 
 'Y'  'Y'  -2.7962   3.5667 
 'International Tables Vol C Tables 4.2.6.8 and 6.1.1.4' 
  
_symmetry_cell_setting            Triclinic 
_symmetry_space_group_name_H-M    P-1 
  
loop_ 
 _symmetry_equiv_pos_as_xyz 
 'x, y, z' 
 '-x, -y, -z' 
  
_cell_length_a                    12.5447(3) 
_cell_length_b                    13.3084(4) 
_cell_length_c                    13.3297(4) 
_cell_angle_alpha                 110.425(3) 
_cell_angle_beta                  94.826(2) 
_cell_angle_gamma                 117.684(3) 
_cell_volume                      1763.55(12) 
_cell_formula_units_Z             1 
_cell_measurement_temperature     173(2) 
_cell_measurement_reflns_used     13024 
_cell_measurement_theta_min       3.7211 
_cell_measurement_theta_max       32.4392 
  
_exptl_crystal_description        blocks 
_exptl_crystal_colour             Colourless 
_exptl_crystal_size_max           0.33 
_exptl_crystal_size_mid           0.18 
_exptl_crystal_size_min           0.17 
_exptl_crystal_density_meas       ? 
_exptl_crystal_density_diffrn     1.382 
_exptl_crystal_density_method     'not measured' 
_exptl_crystal_F_000              764 
_exptl_absorpt_coefficient_mu     1.847 
_exptl_absorpt_correction_type    analytical 
_exptl_absorpt_correction_T_min   0.627 
_exptl_absorpt_correction_T_max   0.790 
_exptl_absorpt_process_details     
; 
CrysAlis RED, Oxford Diffraction Ltd., 
Version 1.171.32.4 (release 27-04-2006 CrysAlis171 .NET) 
(compiled Apr 27 2007,17:53:11) 
Analytical numeric absorption correction using a multifaceted crystal 
model based on expressions derived by R.C. Clark & J.S. Reid. 
(Clark, R. C. & Reid, J. S. (1995). Acta Cryst. A51, 887-897) 
; 
  
_exptl_special_details 
; 
 ? 
; 
  
_diffrn_ambient_temperature       173(2) 
_diffrn_radiation_wavelength      0.71073 
_diffrn_radiation_type            MoK\a 
_diffrn_radiation_source         'Enhance (Mo) X-ray Source'
_diffrn_radiation_monochromator   graphite 
_diffrn_measurement_device_type   'OD Xcalibur 3' 
_diffrn_measurement_method        'phi and omega scans' 
_diffrn_detector_area_resol_mean  15.9863 
_diffrn_standards_number          0 
_diffrn_standards_interval_count  ? 
_diffrn_standards_interval_time   ? 
_diffrn_standards_decay_%         ? 
_diffrn_reflns_number             25979 
_diffrn_reflns_av_R_equivalents   0.0427 
_diffrn_reflns_av_sigmaI/netI     0.0724 
_diffrn_reflns_limit_h_min        -18 
_diffrn_reflns_limit_h_max        18 
_diffrn_reflns_limit_k_min        -18 
_diffrn_reflns_limit_k_max        19 
_diffrn_reflns_limit_l_min        -19 
_diffrn_reflns_limit_l_max        19 
_diffrn_reflns_theta_min          3.73 
_diffrn_reflns_theta_max          32.55 
_reflns_number_total              11274 
_reflns_number_gt                 8273 
_reflns_threshold_expression      >2sigma(I) 
  
_computing_data_collection        'CrysAlis CCD, Oxford Diffraction Ltd' 
_computing_cell_refinement        'CrysAlis RED, Oxford Diffraction Ltd' 
_computing_data_reduction         'CrysAlis RED, Oxford Diffraction Ltd' 
_computing_structure_solution     'SHELXS-97 (Sheldrick, 1990)' 
_computing_structure_refinement   'SHELXL-97 (Sheldrick, 1997)' 
_computing_molecular_graphics     'Bruker SHELXTL' 
_computing_publication_material   'Bruker SHELXTL' 
  
_refine_special_details 
; 
 Refinement of F^2^ against ALL reflections.  The weighted R-factor wR and 
 goodness of fit S are based on F^2^, conventional R-factors R are based 
 on F, with F set to zero for negative F^2^. The threshold expression of 
 F^2^ > 2sigma(F^2^) is used only for calculating R-factors(gt) etc. and is 
 not relevant to the choice of reflections for refinement.  R-factors based 
 on F^2^ are statistically about twice as large as those based on F, and R- 
 factors based on ALL data will be even larger. 
; 
  
_refine_ls_structure_factor_coef  Fsqd 
_refine_ls_matrix_type            full 
_refine_ls_weighting_scheme       calc 
_refine_ls_weighting_details 
 'calc w=1/[\s^2^(Fo^2^)+(0.0374P)^2^+0.9587P] where P=(Fo^2^+2Fc^2^)/3' 
_atom_sites_solution_primary      direct 
_atom_sites_solution_secondary    difmap 
_atom_sites_solution_hydrogens    geom 
_refine_ls_hydrogen_treatment     mixed 
_refine_ls_extinction_method      none 
_refine_ls_extinction_coef        ? 
_refine_ls_number_reflns          11274 
_refine_ls_number_parameters      430 
_refine_ls_number_restraints      180 
_refine_ls_R_factor_all           0.0634 
_refine_ls_R_factor_gt            0.0401 
_refine_ls_wR_factor_ref          0.1059 
_refine_ls_wR_factor_gt           0.0963 
_refine_ls_goodness_of_fit_ref    1.132 
_refine_ls_restrained_S_all       1.164 
_refine_ls_shift/su_max           0.001 
_refine_ls_shift/su_mean          0.000 
  
loop_ 
 _atom_site_label 
 _atom_site_type_symbol 
 _atom_site_fract_x 
 _atom_site_fract_y 
 _atom_site_fract_z 
 _atom_site_U_iso_or_equiv 
 _atom_site_adp_type 
 _atom_site_occupancy 
 _atom_site_symmetry_multiplicity 
 _atom_site_calc_flag 
 _atom_site_refinement_flags 
 _atom_site_disorder_assembly 
 _atom_site_disorder_group 
Y Y 0.36347(2) 0.40342(2) 0.368097(18) 0.01588(6) Uani 1 1 d . . . 
O1 O 0.57340(16) 0.45179(16) 0.44899(13) 0.0178(3) Uani 1 1 d . . . 
P2 P 0.59573(6) 0.39626(6) 0.33502(5) 0.01621(12) Uani 1 1 d . A . 
N3 N 0.4823(2) 0.3647(2) 0.24450(17) 0.0263(5) Uani 1 1 d D . . 
C4 C 0.4228(6) 0.3067(7) 0.1273(4) 0.0197(11) Uani 0.525(8) 1 d PD A 1 
H4A H 0.3632 0.2156 0.1075 0.024 Uiso 0.525(8) 1 calc PR A 1 
C5 C 0.3390(7) 0.3545(8) 0.1021(4) 0.0223(14) Uani 0.525(8) 1 d PD A 1 
H5A H 0.3972 0.4416 0.1104 0.027 Uiso 0.525(8) 1 calc PR A 1 
C4' C 0.4545(6) 0.3563(7) 0.1343(4) 0.0159(13) Uiso 0.475(8) 1 d PD A 2 
H4'A H 0.5066 0.4442 0.1422 0.019 Uiso 0.475(8) 1 calc PR A 2 
C5' C 0.3149(7) 0.3153(8) 0.0927(6) 0.023(2) Uiso 0.475(8) 1 d PD A 2 
H5'A H 0.2625 0.2214 0.0632 0.028 Uiso 0.475(8) 1 calc PR A 2 
N6 N 0.2787(2) 0.3684(2) 0.18769(17) 0.0233(5) Uani 1 1 d D . . 
P7 P 0.18943(6) 0.41935(6) 0.22006(5) 0.01850(13) Uani 1 1 d . A . 
O8 O 0.21730(17) 0.46199(17) 0.34675(14) 0.0214(4) Uani 1 1 d . . . 
C9 C 0.5018(8) 0.3061(10) 0.0464(5) 0.0252(17) Uani 0.525(8) 1 d PD A 1 
H9A H 0.5620 0.3942 0.0603 0.030 Uiso 0.525(8) 1 calc PR A 1 
H9B H 0.5512 0.2697 0.0606 0.030 Uiso 0.525(8) 1 calc PR A 1 
C10 C 0.4210(6) 0.2306(7) -0.0752(4) 0.0340(16) Uani 0.525(8) 1 d PD A 1 
H10A H 0.4768 0.2450 -0.1235 0.041 Uiso 0.525(8) 1 calc PR A 1 
H10B H 0.3764 0.1396 -0.0934 0.041 Uiso 0.525(8) 1 calc PR A 1 
C11 C 0.3260(8) 0.2618(9) -0.1027(5) 0.0296(18) Uani 0.525(8) 1 d PDU A 1 
H11A H 0.3693 0.3413 -0.1108 0.036 Uiso 0.525(8) 1 calc PR A 1 
H11B H 0.2638 0.1941 -0.1761 0.036 Uiso 0.525(8) 1 calc PR A 1 
C12 C 0.2574(6) 0.2769(7) -0.0188(4) 0.0287(15) Uani 0.525(8) 1 d PD A 1 
H12A H 0.1928 0.1919 -0.0286 0.034 Uiso 0.525(8) 1 calc PR A 1 
H12B H 0.2127 0.3170 -0.0345 0.034 Uiso 0.525(8) 1 calc PR A 1 
C9' C 0.4811(10) 0.2740(10) 0.0401(6) 0.026(3) Uiso 0.475(8) 1 d PD A 2 
H9'A H 0.4210 0.1836 0.0188 0.032 Uiso 0.475(8) 1 calc PR A 2 
H9'B H 0.5676 0.2929 0.0658 0.032 Uiso 0.475(8) 1 calc PR A 2 
C10' C 0.4676(6) 0.3013(8) -0.0612(5) 0.0285(15) Uiso 0.475(8) 1 d PD A 2 
H10C H 0.5363 0.3884 -0.0420 0.034 Uiso 0.475(8) 1 calc PR A 2 
H10D H 0.4774 0.2428 -0.1243 0.034 Uiso 0.475(8) 1 calc PR A 2 
C11' C 0.3442(8) 0.2878(10) -0.0981(7) 0.026(2) Uiso 0.475(8) 1 d PDU A 2 
H11C H 0.2793 0.1967 -0.1409 0.031 Uiso 0.475(8) 1 calc PR A 2 
H11D H 0.3505 0.3271 -0.1500 0.031 Uiso 0.475(8) 1 calc PR A 2 
C12' C 0.2988(6) 0.3460(7) -0.0045(5) 0.0255(14) Uiso 0.475(8) 1 d PD A 2 
H12C H 0.3468 0.4389 0.0228 0.031 Uiso 0.475(8) 1 calc PR A 2 
H12D H 0.2087 0.3142 -0.0350 0.031 Uiso 0.475(8) 1 calc PR A 2 
C13 C 0.6003(2) 0.2595(2) 0.3256(2) 0.0203(5) Uani 1 1 d . . . 
C14 C 0.5300(3) 0.1468(2) 0.2283(2) 0.0255(5) Uani 1 1 d . A . 
H14A H 0.4757 0.1404 0.1692 0.031 Uiso 1 1 calc R . . 
C15 C 0.5389(3) 0.0431(3) 0.2170(3) 0.0325(6) Uani 1 1 d . . . 
H15A H 0.4918 -0.0332 0.1497 0.039 Uiso 1 1 calc R A . 
C16 C 0.6156(3) 0.0511(3) 0.3032(3) 0.0344(7) Uani 1 1 d . A . 
H16A H 0.6227 -0.0193 0.2946 0.041 Uiso 1 1 calc R . . 
C17 C 0.6823(3) 0.1604(3) 0.4017(3) 0.0349(7) Uani 1 1 d . . . 
H17A H 0.7322 0.1640 0.4621 0.042 Uiso 1 1 calc R A . 
C18 C 0.6768(3) 0.2656(3) 0.4131(2) 0.0272(6) Uani 1 1 d . A . 
H18A H 0.7251 0.3418 0.4804 0.033 Uiso 1 1 calc R . . 
C19 C 0.7530(2) 0.5065(2) 0.3391(2) 0.0206(5) Uani 1 1 d . . . 
C20 C 0.8549(3) 0.5581(3) 0.4305(2) 0.0289(6) Uani 1 1 d . A . 
H20A H 0.8413 0.5407 0.4931 0.035 Uiso 1 1 calc R . . 
C21 C 0.9770(3) 0.6352(3) 0.4307(3) 0.0353(7) Uani 1 1 d . . . 
H21A H 1.0461 0.6689 0.4931 0.042 Uiso 1 1 calc R A . 
C22 C 0.9990(3) 0.6634(3) 0.3414(3) 0.0348(7) Uani 1 1 d . A . 
H22A H 1.0826 0.7163 0.3424 0.042 Uiso 1 1 calc R . . 
C23 C 0.8987(3) 0.6141(3) 0.2509(3) 0.0377(7) Uani 1 1 d . . . 
H23A H 0.9131 0.6340 0.1896 0.045 Uiso 1 1 calc R A . 
C24 C 0.7762(3) 0.5354(3) 0.2489(2) 0.0313(6) Uani 1 1 d . A . 
H24A H 0.7077 0.5008 0.1856 0.038 Uiso 1 1 calc R . . 
C25 C 0.2162(2) 0.5513(3) 0.1925(2) 0.0230(5) Uani 1 1 d . . . 
C26 C 0.2984(3) 0.6733(3) 0.2751(3) 0.0318(6) Uani 1 1 d . A . 
H26A H 0.3408 0.6866 0.3453 0.038 Uiso 1 1 calc R . . 
C27 C 0.3192(3) 0.7755(3) 0.2567(3) 0.0437(8) Uani 1 1 d . . . 
H27A H 0.3749 0.8588 0.3143 0.052 Uiso 1 1 calc R A . 
C28 C 0.2588(3) 0.7567(3) 0.1541(4) 0.0465(9) Uani 1 1 d . A . 
H28A H 0.2723 0.8272 0.1416 0.056 Uiso 1 1 calc R . . 
C29 C 0.1802(4) 0.6373(4) 0.0709(4) 0.0537(10) Uani 1 1 d . . . 
H29A H 0.1407 0.6250 0.0000 0.064 Uiso 1 1 calc R A . 
C30 C 0.1575(3) 0.5337(3) 0.0892(3) 0.0388(7) Uani 1 1 d . A . 
H30A H 0.1018 0.4507 0.0312 0.047 Uiso 1 1 calc R . . 
C31 C 0.0233(2) 0.3045(2) 0.1538(2) 0.0198(5) Uani 1 1 d . . . 
C32 C -0.0224(3) 0.1875(3) 0.0642(2) 0.0291(6) Uani 1 1 d . A . 
H32A H 0.0347 0.1676 0.0333 0.035 Uiso 1 1 calc R . . 
C33 C -0.1510(3) 0.1000(3) 0.0199(2) 0.0359(7) Uani 1 1 d . . . 
H33A H -0.1818 0.0203 -0.0413 0.043 Uiso 1 1 calc R A . 
C34 C -0.2342(3) 0.1282(3) 0.0643(3) 0.0354(7) Uani 1 1 d . A . 
H34A H -0.3222 0.0677 0.0345 0.043 Uiso 1 1 calc R . . 
C35 C -0.1895(3) 0.2439(3) 0.1519(3) 0.0375(7) Uani 1 1 d . . . 
H35A H -0.2472 0.2635 0.1819 0.045 Uiso 1 1 calc R A . 
C36 C -0.0626(3) 0.3317(3) 0.1967(2) 0.0290(6) Uani 1 1 d . A . 
H36A H -0.0331 0.4114 0.2573 0.035 Uiso 1 1 calc R . . 
N40 N 0.2570(2) 0.2232(2) 0.38372(18) 0.0235(5) Uani 1 1 d . . . 
Si41 Si 0.11787(8) 0.10132(7) 0.28253(6) 0.02657(17) Uani 1 1 d D A . 
H41 H 0.123(3) 0.102(3) 0.1746(14) 0.052(10) Uiso 1 1 d D . . 
C42 C 0.0806(4) -0.0601(3) 0.2579(3) 0.0464(9) Uani 1 1 d . . . 
H42A H 0.1519 -0.0685 0.2430 0.070 Uiso 1 1 calc R A . 
H42B H 0.0054 -0.1236 0.1932 0.070 Uiso 1 1 calc R . . 
H42C H 0.0648 -0.0730 0.3245 0.070 Uiso 1 1 calc R . . 
C43 C -0.0220(3) 0.1095(3) 0.3099(3) 0.0427(8) Uani 1 1 d . . . 
H43A H -0.0062 0.1932 0.3235 0.064 Uiso 1 1 calc R A . 
H43B H -0.0371 0.0948 0.3758 0.064 Uiso 1 1 calc R . . 
H43C H -0.0962 0.0447 0.2446 0.064 Uiso 1 1 calc R . . 
Si44 Si 0.31151(8) 0.21286(7) 0.49871(6) 0.02713(17) Uani 1 1 d D A . 
H44 H 0.4168(16) 0.3378(10) 0.5757(18) 0.021(7) Uiso 1 1 d D . . 
C45 C 0.1930(4) 0.1620(4) 0.5742(3) 0.0450(8) Uani 1 1 d . . . 
H45A H 0.1577 0.2159 0.5903 0.067 Uiso 1 1 calc R A . 
H45B H 0.2338 0.1695 0.6446 0.067 Uiso 1 1 calc R . . 
H45C H 0.1253 0.0740 0.5273 0.067 Uiso 1 1 calc R . . 
C46 C 0.3733(3) 0.1051(3) 0.4723(3) 0.0422(8) Uani 1 1 d . . . 
H46A H 0.4362 0.1277 0.4323 0.063 Uiso 1 1 calc R A . 
H46B H 0.3036 0.0175 0.4269 0.063 Uiso 1 1 calc R . . 
H46C H 0.4124 0.1136 0.5440 0.063 Uiso 1 1 calc R . . 
  
loop_ 
 _atom_site_aniso_label 
 _atom_site_aniso_U_11 
 _atom_site_aniso_U_22 
 _atom_site_aniso_U_33 
 _atom_site_aniso_U_23 
 _atom_site_aniso_U_13 
 _atom_site_aniso_U_12 
Y 0.01698(12) 0.01827(11) 0.01225(10) 0.00544(8) 0.00314(8) 0.01030(10) 
O1 0.0178(9) 0.0182(8) 0.0135(7) 0.0042(6) 0.0031(6) 0.0091(7) 
P2 0.0166(3) 0.0180(3) 0.0142(3) 0.0058(2) 0.0046(2) 0.0102(3) 
N3 0.0263(12) 0.0429(14) 0.0139(10) 0.0105(9) 0.0074(9) 0.0225(11) 
C4 0.022(3) 0.019(3) 0.014(2) 0.0067(19) 0.0026(18) 0.010(2) 
C5 0.030(3) 0.027(4) 0.008(2) 0.005(2) 0.004(2) 0.016(3) 
N6 0.0267(12) 0.0329(12) 0.0165(10) 0.0105(9) 0.0052(9) 0.0208(11) 
P7 0.0196(3) 0.0211(3) 0.0152(3) 0.0071(2) 0.0022(2) 0.0122(3) 
O8 0.0245(9) 0.0260(9) 0.0147(8) 0.0057(7) 0.0027(7) 0.0169(8) 
C9 0.031(4) 0.034(5) 0.013(3) 0.008(3) 0.011(2) 0.021(4) 
C10 0.046(4) 0.039(4) 0.018(2) 0.009(2) 0.013(2) 0.025(3) 
C11 0.040(3) 0.029(4) 0.009(2) 0.007(2) 0.0031(19) 0.012(3) 
C12 0.034(3) 0.037(4) 0.020(2) 0.010(2) 0.004(2) 0.025(3) 
C13 0.0182(12) 0.0184(11) 0.0236(12) 0.0081(10) 0.0088(10) 0.0096(10) 
C14 0.0227(14) 0.0208(12) 0.0262(13) 0.0067(10) 0.0044(11) 0.0095(11) 
C15 0.0360(17) 0.0157(12) 0.0345(15) 0.0043(11) 0.0096(13) 0.0105(12) 
C16 0.0359(17) 0.0214(14) 0.0508(18) 0.0156(13) 0.0139(14) 0.0188(13) 
C17 0.0330(17) 0.0269(15) 0.0447(17) 0.0156(13) 0.0019(13) 0.0174(14) 
C18 0.0268(15) 0.0212(13) 0.0280(13) 0.0082(11) 0.0007(11) 0.0117(12) 
C19 0.0213(13) 0.0194(12) 0.0234(12) 0.0090(10) 0.0093(10) 0.0123(11) 
C20 0.0219(14) 0.0327(15) 0.0255(13) 0.0120(11) 0.0069(11) 0.0103(12) 
C21 0.0196(14) 0.0377(17) 0.0346(16) 0.0103(13) 0.0051(12) 0.0095(13) 
C22 0.0257(15) 0.0305(15) 0.0448(17) 0.0155(14) 0.0184(13) 0.0119(13) 
C23 0.0381(18) 0.0362(17) 0.0427(17) 0.0257(15) 0.0222(15) 0.0149(15) 
C24 0.0289(15) 0.0344(15) 0.0314(15) 0.0203(13) 0.0093(12) 0.0131(13) 
C25 0.0186(13) 0.0261(13) 0.0299(13) 0.0159(11) 0.0075(10) 0.0131(11) 
C26 0.0328(16) 0.0300(15) 0.0351(15) 0.0150(13) 0.0115(13) 0.0176(14) 
C27 0.047(2) 0.0306(16) 0.062(2) 0.0269(16) 0.0272(18) 0.0200(16) 
C28 0.040(2) 0.043(2) 0.084(3) 0.048(2) 0.0265(19) 0.0264(17) 
C29 0.038(2) 0.070(3) 0.074(3) 0.058(2) 0.0118(19) 0.025(2) 
C30 0.0341(17) 0.0405(17) 0.0413(17) 0.0256(15) -0.0010(14) 0.0160(15) 
C31 0.0227(13) 0.0202(12) 0.0178(11) 0.0092(9) 0.0032(9) 0.0121(11) 
C32 0.0286(15) 0.0276(14) 0.0254(13) 0.0050(11) 0.0043(11) 0.0160(13) 
C33 0.0337(17) 0.0271(15) 0.0257(14) 0.0005(12) -0.0008(12) 0.0101(13) 
C34 0.0241(15) 0.0333(16) 0.0329(15) 0.0118(13) 0.0033(12) 0.0064(13) 
C35 0.0259(16) 0.0370(17) 0.0410(17) 0.0124(14) 0.0134(13) 0.0133(14) 
C36 0.0278(15) 0.0269(14) 0.0287(14) 0.0077(11) 0.0104(11) 0.0148(13) 
N40 0.0296(12) 0.0233(11) 0.0221(10) 0.0124(9) 0.0081(9) 0.0156(10) 
Si41 0.0330(4) 0.0206(4) 0.0231(4) 0.0087(3) 0.0051(3) 0.0132(3) 
C42 0.060(2) 0.0242(15) 0.0383(18) 0.0077(13) -0.0001(16) 0.0172(16) 
C43 0.0317(18) 0.047(2) 0.0448(19) 0.0213(16) 0.0089(14) 0.0164(16) 
Si44 0.0332(4) 0.0257(4) 0.0242(4) 0.0140(3) 0.0067(3) 0.0150(4) 
C45 0.059(2) 0.051(2) 0.0305(16) 0.0234(15) 0.0204(16) 0.0279(19) 
C46 0.043(2) 0.0450(19) 0.055(2) 0.0333(17) 0.0148(16) 0.0271(17) 
  
_geom_special_details 
; 
 All esds (except the esd in the dihedral angle between two l.s. planes) 
 are estimated using the full covariance matrix.  The cell esds are taken 
 into account individually in the estimation of esds in distances, angles 
 and torsion angles; correlations between esds in cell parameters are only 
 used when they are defined by crystal symmetry.  An approximate (isotropic) 
 treatment of cell esds is used for estimating esds involving l.s. planes. 
; 
  
loop_ 
 _geom_bond_atom_site_label_1 
 _geom_bond_atom_site_label_2 
 _geom_bond_distance 
 _geom_bond_site_symmetry_2 
 _geom_bond_publ_flag 
Y N40 2.236(2) . ? 
Y O1 2.2942(16) 2_666 ? 
Y O8 2.3336(17) . ? 
Y N6 2.336(2) . ? 
Y N3 2.395(2) . ? 
Y O1 2.4444(16) . ? 
O1 P2 1.5534(17) . ? 
O1 Y 2.2942(16) 2_666 ? 
P2 N3 1.568(2) . ? 
P2 C13 1.808(3) . ? 
P2 C19 1.812(3) . ? 
N3 C4 1.422(5) . ? 
N3 C4' 1.433(5) . ? 
C4 C9 1.526(7) . ? 
C4 C5 1.527(7) . ? 
C5 N6 1.427(5) . ? 
C5 C12 1.513(7) . ? 
C4' C9' 1.530(8) . ? 
C4' C5' 1.552(8) . ? 
C5' N6 1.442(7) . ? 
C5' C12' 1.513(8) . ? 
N6 P7 1.576(2) . ? 
P7 O8 1.5309(17) . ? 
P7 C31 1.802(3) . ? 
P7 C25 1.803(3) . ? 
C9 C10 1.517(8) . ? 
C10 C11 1.490(8) . ? 
C11 C12 1.482(8) . ? 
C9' C10' 1.531(9) . ? 
C10' C11' 1.492(9) . ? 
C11' C12' 1.528(9) . ? 
C13 C14 1.390(3) . ? 
C13 C18 1.401(4) . ? 
C14 C15 1.392(4) . ? 
C15 C16 1.375(4) . ? 
C16 C17 1.375(4) . ? 
C17 C18 1.389(4) . ? 
C19 C20 1.389(4) . ? 
C19 C24 1.399(4) . ? 
C20 C21 1.391(4) . ? 
C21 C22 1.380(4) . ? 
C22 C23 1.376(5) . ? 
C23 C24 1.391(4) . ? 
C25 C26 1.385(4) . ? 
C25 C30 1.392(4) . ? 
C26 C27 1.374(4) . ? 
C27 C28 1.386(5) . ? 
C28 C29 1.362(6) . ? 
C29 C30 1.386(5) . ? 
C31 C32 1.392(3) . ? 
C31 C36 1.393(4) . ? 
C32 C33 1.387(4) . ? 
C33 C34 1.376(4) . ? 
C34 C35 1.372(4) . ? 
C35 C36 1.372(4) . ? 
N40 Si44 1.701(2) . ? 
N40 Si41 1.715(2) . ? 
Si41 C43 1.865(3) . ? 
Si41 C42 1.868(3) . ? 
Si44 C45 1.863(3) . ? 
Si44 C46 1.873(3) . ? 
  
loop_ 
 _geom_angle_atom_site_label_1 
 _geom_angle_atom_site_label_2 
 _geom_angle_atom_site_label_3 
 _geom_angle 
 _geom_angle_site_symmetry_1 
 _geom_angle_site_symmetry_3 
 _geom_angle_publ_flag 
N40 Y O1 100.48(7) . 2_666 ? 
N40 Y O8 104.82(7) . . ? 
O1 Y O8 83.20(6) 2_666 . ? 
N40 Y N6 108.62(8) . . ? 
O1 Y N6 139.70(7) 2_666 . ? 
O8 Y N6 63.06(6) . . ? 
N40 Y N3 104.15(8) . . ? 
O1 Y N3 131.26(7) 2_666 . ? 
O8 Y N3 128.34(7) . . ? 
N6 Y N3 67.53(7) . . ? 
N40 Y O1 96.01(7) . . ? 
O1 Y O1 74.74(6) 2_666 . ? 
O8 Y O1 152.06(6) . . ? 
N6 Y O1 127.29(7) . . ? 
N3 Y O1 61.46(6) . . ? 
P2 O1 Y 153.56(11) . 2_666 ? 
P2 O1 Y 95.67(8) . . ? 
Y O1 Y 105.26(6) 2_666 . ? 
O1 P2 N3 104.84(10) . . ? 
O1 P2 C13 106.99(11) . . ? 
N3 P2 C13 113.96(13) . . ? 
O1 P2 C19 108.95(11) . . ? 
N3 P2 C19 117.27(13) . . ? 
C13 P2 C19 104.41(11) . . ? 
O1 P2 Y 53.58(6) . . ? 
N3 P2 Y 51.83(8) . . ? 
C13 P2 Y 118.52(8) . . ? 
C19 P2 Y 136.49(8) . . ? 
C4 N3 P2 143.8(2) . . ? 
C4' N3 P2 139.2(3) . . ? 
C4 N3 Y 117.7(2) . . ? 
C4' N3 Y 120.8(2) . . ? 
P2 N3 Y 97.20(9) . . ? 
N3 C4 C9 119.6(5) . . ? 
N3 C4 C5 110.5(4) . . ? 
C9 C4 C5 110.4(5) . . ? 
N6 C5 C12 118.2(5) . . ? 
N6 C5 C4 108.5(4) . . ? 
C12 C5 C4 110.9(5) . . ? 
N3 C4' C9' 119.6(5) . . ? 
N3 C4' C5' 110.4(4) . . ? 
C9' C4' C5' 107.6(6) . . ? 
N6 C5' C12' 117.2(5) . . ? 
N6 C5' C4' 108.5(5) . . ? 
C12' C5' C4' 108.9(6) . . ? 
C5 N6 P7 136.7(3) . . ? 
C5' N6 P7 141.3(3) . . ? 
C5 N6 Y 122.8(2) . . ? 
C5' N6 Y 122.7(3) . . ? 
P7 N6 Y 95.94(9) . . ? 
O8 P7 N6 103.63(10) . . ? 
O8 P7 C31 108.86(11) . . ? 
N6 P7 C31 115.22(12) . . ? 
O8 P7 C25 108.55(11) . . ? 
N6 P7 C25 115.86(12) . . ? 
C31 P7 C25 104.51(11) . . ? 
O8 P7 Y 51.68(6) . . ? 
N6 P7 Y 51.97(7) . . ? 
C31 P7 Y 126.05(8) . . ? 
C25 P7 Y 128.83(9) . . ? 
P7 O8 Y 97.34(8) . . ? 
C10 C9 C4 112.0(6) . . ? 
C11 C10 C9 114.5(5) . . ? 
C12 C11 C10 114.7(5) . . ? 
C11 C12 C5 115.1(5) . . ? 
C4' C9' C10' 109.0(6) . . ? 
C11' C10' C9' 113.4(6) . . ? 
C10' C11' C12' 115.7(6) . . ? 
C5' C12' C11' 112.2(6) . . ? 
C14 C13 C18 118.9(2) . . ? 
C14 C13 P2 119.7(2) . . ? 
C18 C13 P2 121.39(19) . . ? 
C13 C14 C15 120.3(3) . . ? 
C16 C15 C14 120.1(3) . . ? 
C15 C16 C17 120.3(3) . . ? 
C16 C17 C18 120.2(3) . . ? 
C17 C18 C13 120.1(3) . . ? 
C20 C19 C24 118.4(3) . . ? 
C20 C19 P2 119.8(2) . . ? 
C24 C19 P2 121.6(2) . . ? 
C19 C20 C21 120.3(3) . . ? 
C22 C21 C20 120.9(3) . . ? 
C23 C22 C21 119.4(3) . . ? 
C22 C23 C24 120.3(3) . . ? 
C23 C24 C19 120.7(3) . . ? 
C26 C25 C30 118.8(3) . . ? 
C26 C25 P7 119.6(2) . . ? 
C30 C25 P7 121.6(2) . . ? 
C27 C26 C25 120.7(3) . . ? 
C26 C27 C28 119.9(3) . . ? 
C29 C28 C27 120.2(3) . . ? 
C28 C29 C30 120.3(3) . . ? 
C29 C30 C25 120.1(3) . . ? 
C32 C31 C36 118.7(3) . . ? 
C32 C31 P7 122.5(2) . . ? 
C36 C31 P7 118.83(19) . . ? 
C33 C32 C31 120.2(3) . . ? 
C34 C33 C32 120.2(3) . . ? 
C35 C34 C33 119.8(3) . . ? 
C36 C35 C34 120.8(3) . . ? 
C35 C36 C31 120.4(3) . . ? 
Si44 N40 Si41 121.61(14) . . ? 
Si44 N40 Y 119.36(12) . . ? 
Si41 N40 Y 118.94(11) . . ? 
N40 Si41 C43 113.44(14) . . ? 
N40 Si41 C42 114.93(14) . . ? 
C43 Si41 C42 106.81(18) . . ? 
N40 Si44 C45 113.86(14) . . ? 
N40 Si44 C46 115.34(14) . . ? 
C45 Si44 C46 106.16(16) . . ? 
  
_diffrn_measured_fraction_theta_max    0.881 
_diffrn_reflns_theta_full              30.00
_diffrn_measured_fraction_theta_full   0.983 
_refine_diff_density_max    0.449 
_refine_diff_density_min   -0.476 
_refine_diff_density_rms    0.083 
  
#===END
